# Supplementary material for: In Silico Substrate-Binding Profiling for SARS-CoV-2 Main Protease (Mpro) Using Hexapeptide Substrates
Source: MDPI journal article supplement (doi:10.3390/v15071480), 2023-06-29
Supplement: s1 [file s1]

# In Silico Substrate-Binding Profiling for SARS-CoV-2 Main Protease (M<sup>pro</sup>) Using Hexapeptide Substrates

Sophakama Zabo and Kevin Alan Lobb \*

## Supplementary Material

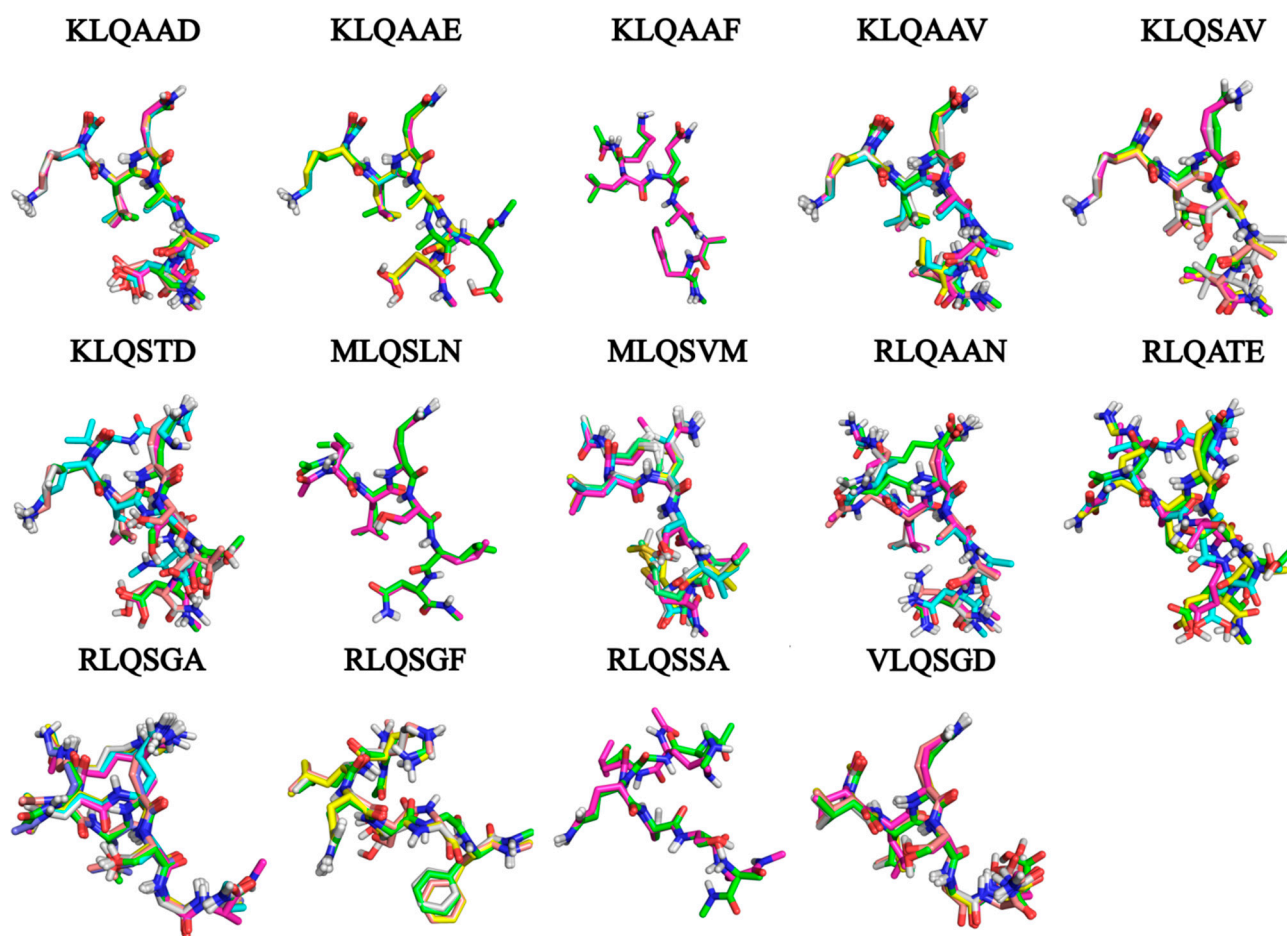

Supplementary Figure S1. Validation of reproducibility of the best poses in the docking results. The visualisation of the best poses of substrates with all 100 conformers docked. Image was generated using PyMOL.

Supplementary Table S1: The ligand efficiencies of the hexapeptide substrates docked onto SARS-CoV-2 M<sup>pro</sup> on basis of recognition sequence.

| Sequence | Docking Score (kcal.mol <sup>-1</sup> ) | HA | LE (kcal.mol <sup>-1</sup> per atom) |
|----------|-----------------------------------------|----|--------------------------------------|
| LQ↓A     | -8.0 ± 0.28                             | 22 | -0.4 ± 0.01                          |
| LQ↓S     | -7.9 ± 0.28                             | 23 | -0.3 ± 0.01                          |

HA: heavy atoms (non-hydrogen atoms); LE: ligand efficiency.

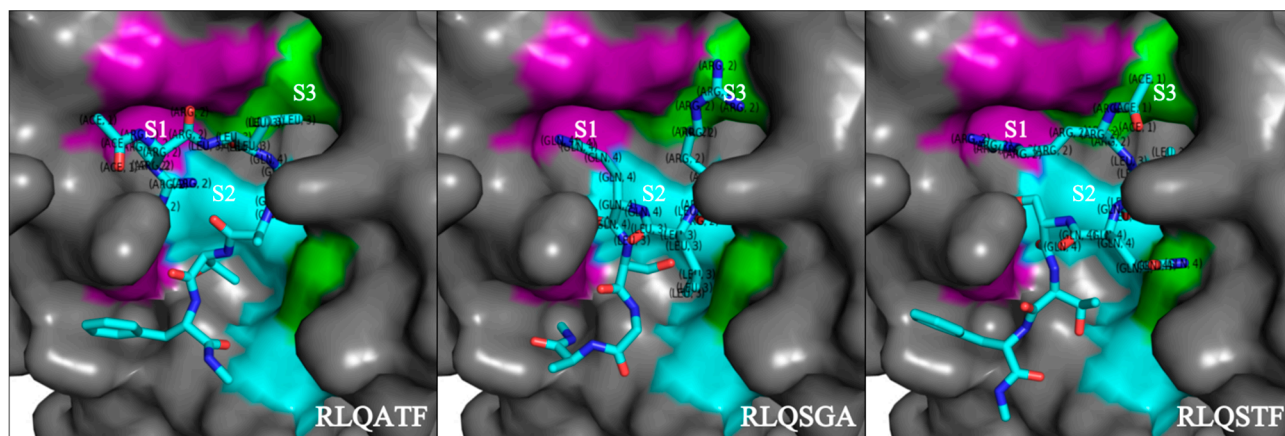

Supplementary Figure S2. Confirmation of SARS-CoV-2 M<sup>pro</sup> substrate recognition in binding poses for substrates RLQATF, RLQSGA and RLQSTF. The surface of SARS-CoV-2 M<sup>pro</sup> (PDB ID:6XHM) showing docked substrates and substrate binding subsites colour-coded as follows: Purple: S1, Cyan: S2; Green: S3. The substrates attained a docking score of -8.7 kcal.mol<sup>-1</sup>. The image was generated using PyMOL.

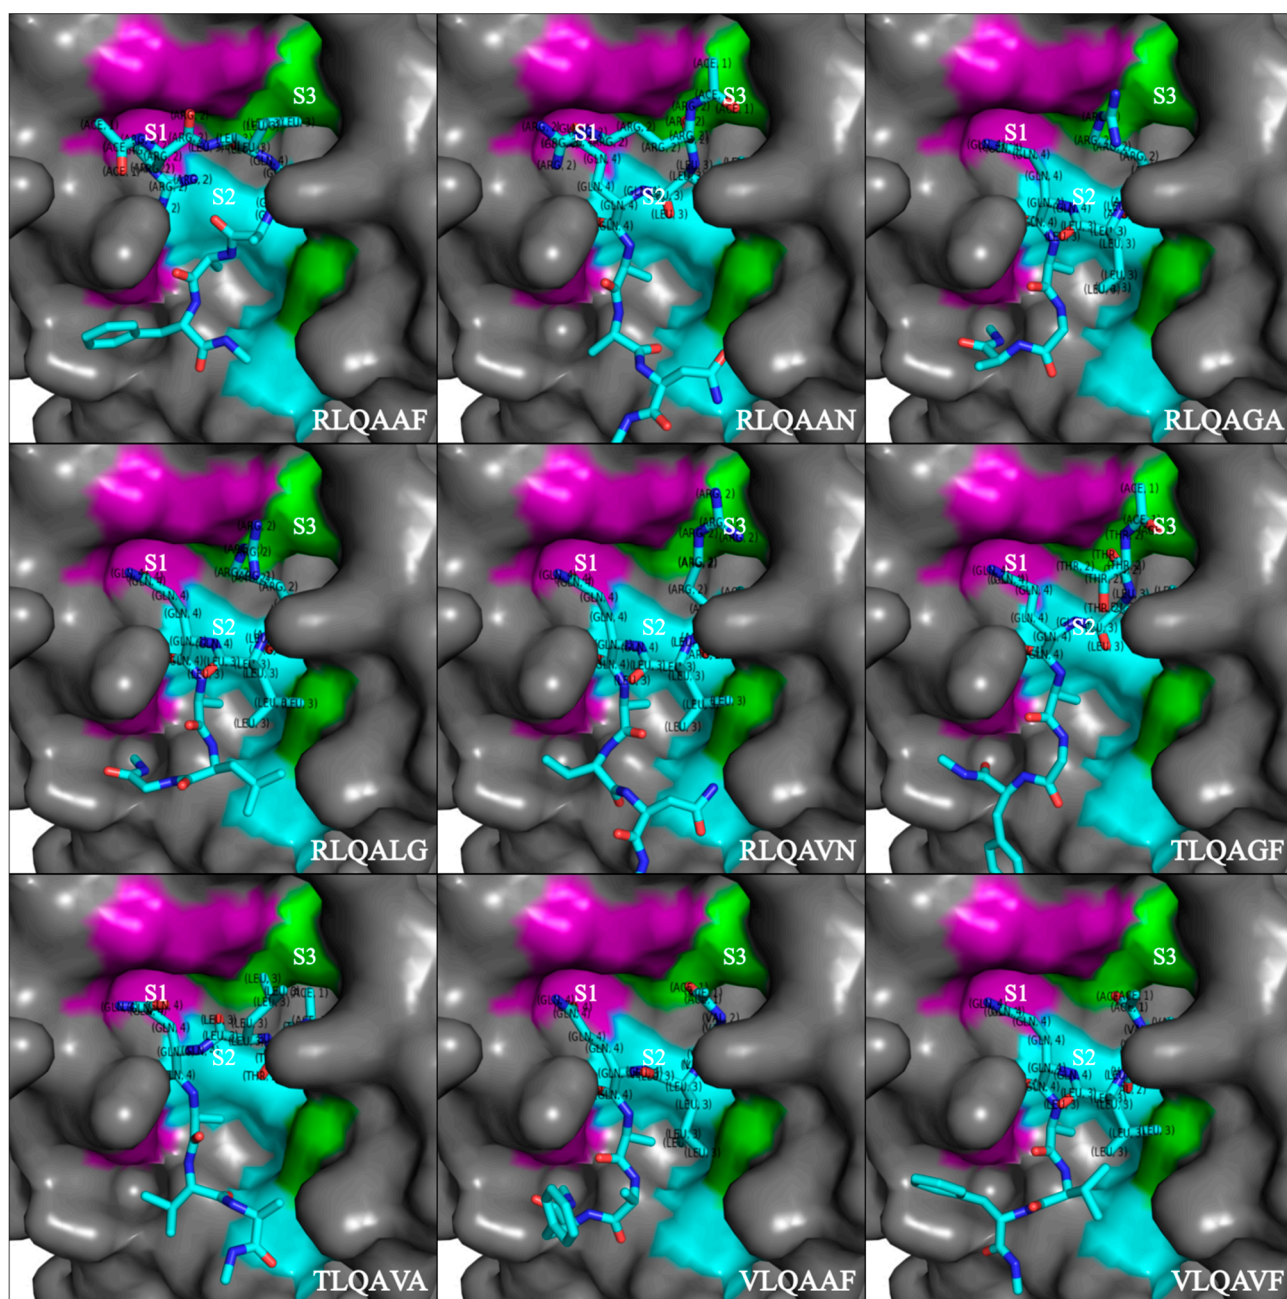

Supplementary Figure S3. Confirmation of SARS-CoV-2 M<sup>pro</sup> substrate recognition in binding poses for substrates RLQAAN, RLQAAF, RLQAGA, RLQALG, RLQAVN, TLQAGF, TLQAVA, VLQAAF and VLQAVF. The surface of SARS-CoV-2 M<sup>pro</sup> (PDB ID:6XHM) showing docked substrates and substrate binding subsites colour-coded as follows: Purple: S1, Cyan: S2; Green: S3. The substrates attained a docking score of  $-8.6 \text{ kcal.mol}^{-1}$ . The image was generated using PyMOL.



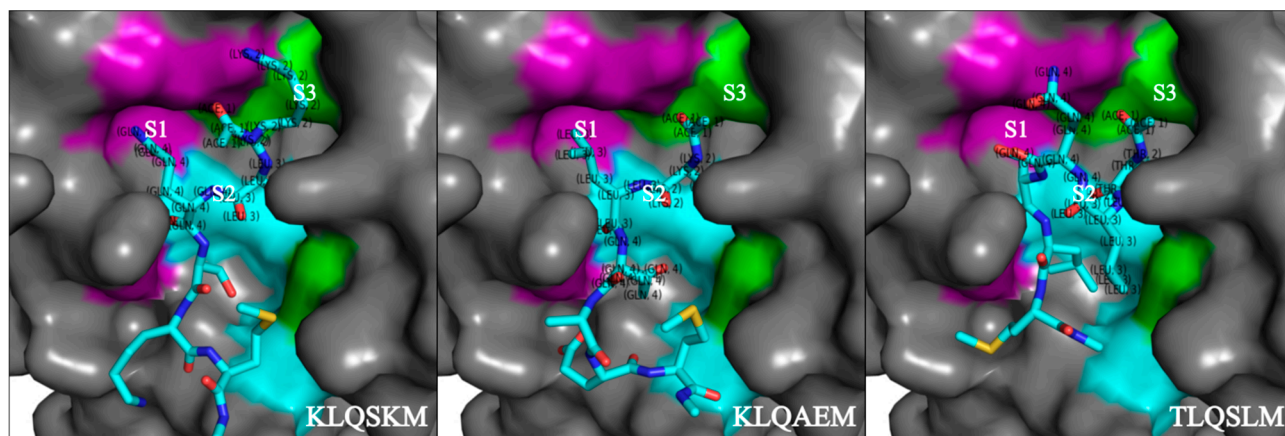

Supplementary Figure S4. Confirmation of SARS-CoV-2 M<sup>pro</sup> substrate recognition in binding poses for substrates KLQSKM, KLQAEM and TLQSLM. The surface of SARS-CoV-2 M<sup>pro</sup> (PDB ID:6XHM) showing docked substrates and substrate binding subsites color-coded as follows: Purple: S1, Cyan: S2; Green: S3. The substrates attained docking score of  $-7.0 \text{ kcal.mol}^{-1}$  (KLQSKM) and  $-7.1 \text{ kcal.mol}^{-1}$  (KLQAEM and TLQSLM). Image was generated using PyMOL

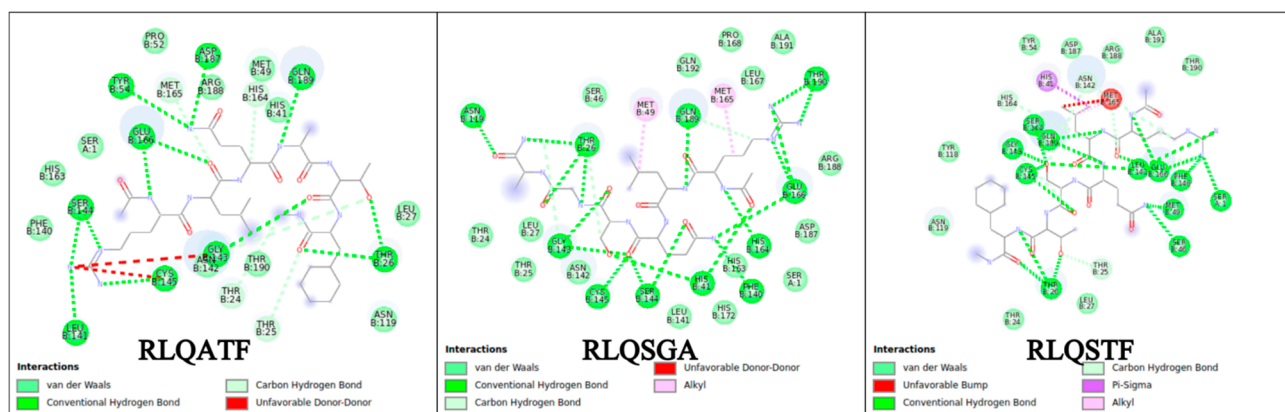

Supplementary Figure S5. Resolution of intermolecular interactions between M<sup>pro</sup> and substrates at the active site. 2D representation of the protein-ligand interactions at active sites for M<sup>pro</sup> complexed with RLQATF, RLQSGA and RLQSTF hexapeptides. The substrates attained a docking score of  $-8.6 \text{ kcal.mol}^{-1}$ . The images were generated on BIOVIA Discovery Studio 2020 Client.



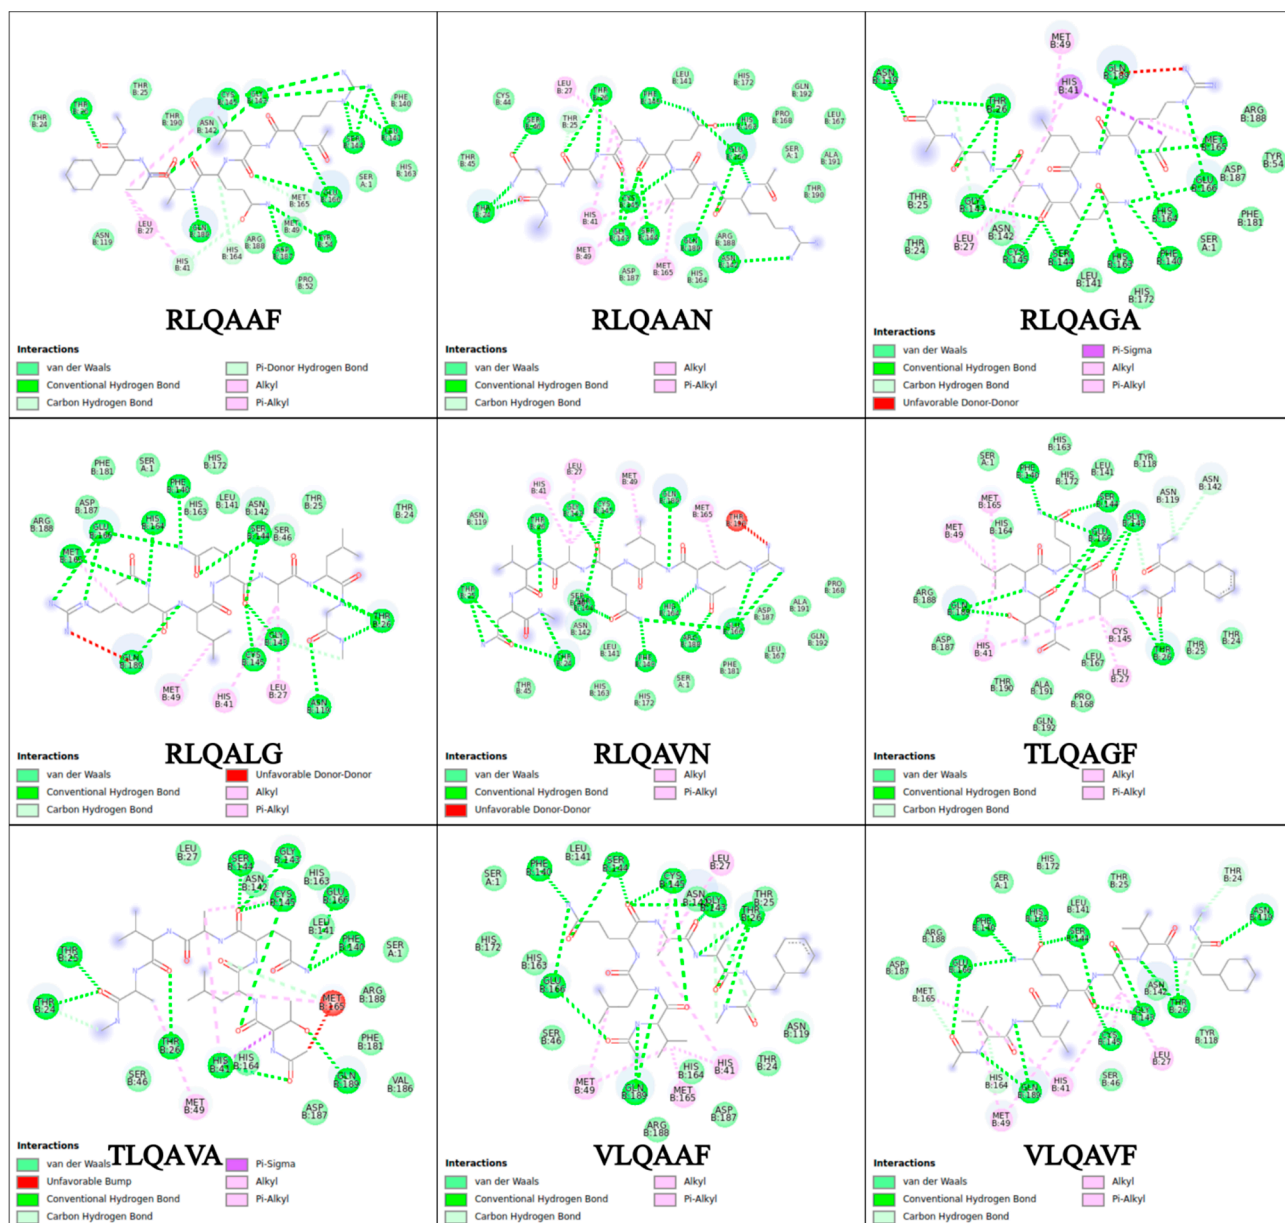

Supplementary Figure S6. Resolution of intermolecular interactions between M<sup>Pro</sup> and substrates at the active site. 2D representation of the protein-ligand interactions at active sites for M<sup>Pro</sup> complexed with RLQAAF, RLQAAN, RLQAGA, RLQALG, RLQAVN, TLQAGE, TLQAVA, VLQAAF and VLQAVF hexapeptides. The substrates attained a docking score of -8.6 kcal.mol<sup>-1</sup>. The images were generated on BIOVIA Discovery Studio 2020 Client.

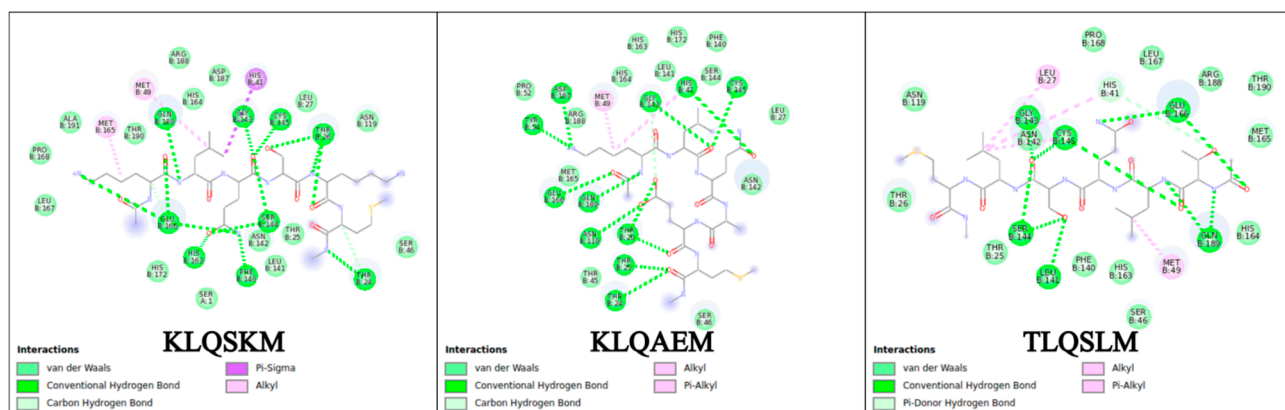

Supplementary Figure S7. Resolution of intermolecular interactions between M<sup>Pro</sup> and substrates at the active site. 2D representation of the protein-ligand interactions at active sites for M<sup>Pro</sup>

complexed with KLQSKM, KLQAEM and TLQSLM hexapeptides. The substrates attained docking score of  $-7.0 \text{ kcal.mol}^{-1}$  (KLQSKM) and  $-7.1 \text{ kcal.mol}^{-1}$  (KLQAEM and TLQSLM). The images were generated on BIOVIA Discovery Studio 2020 Client.

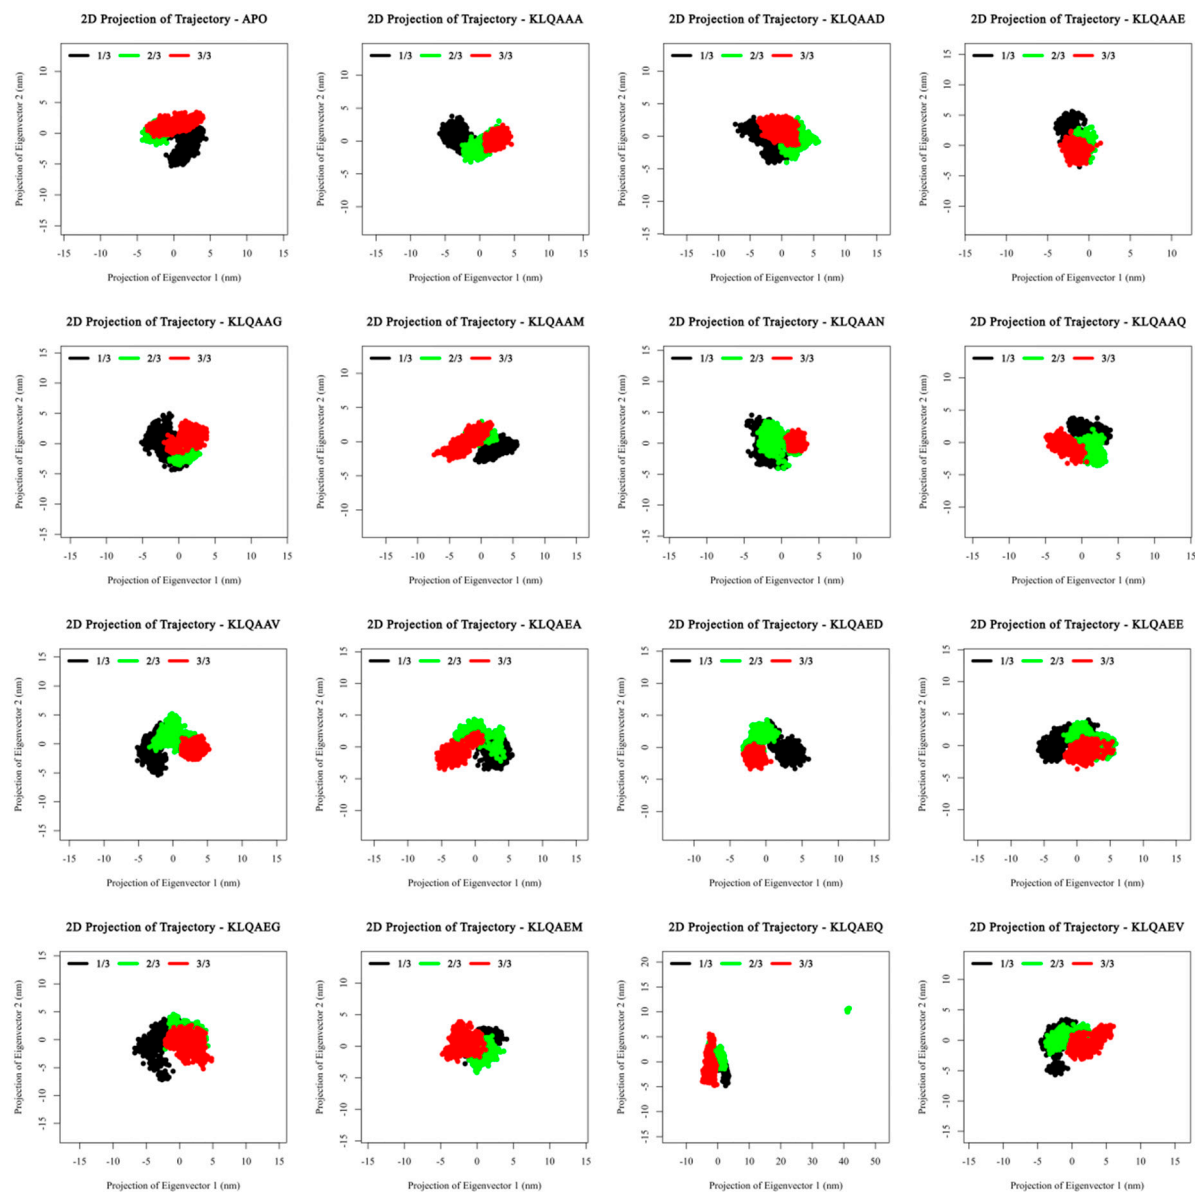

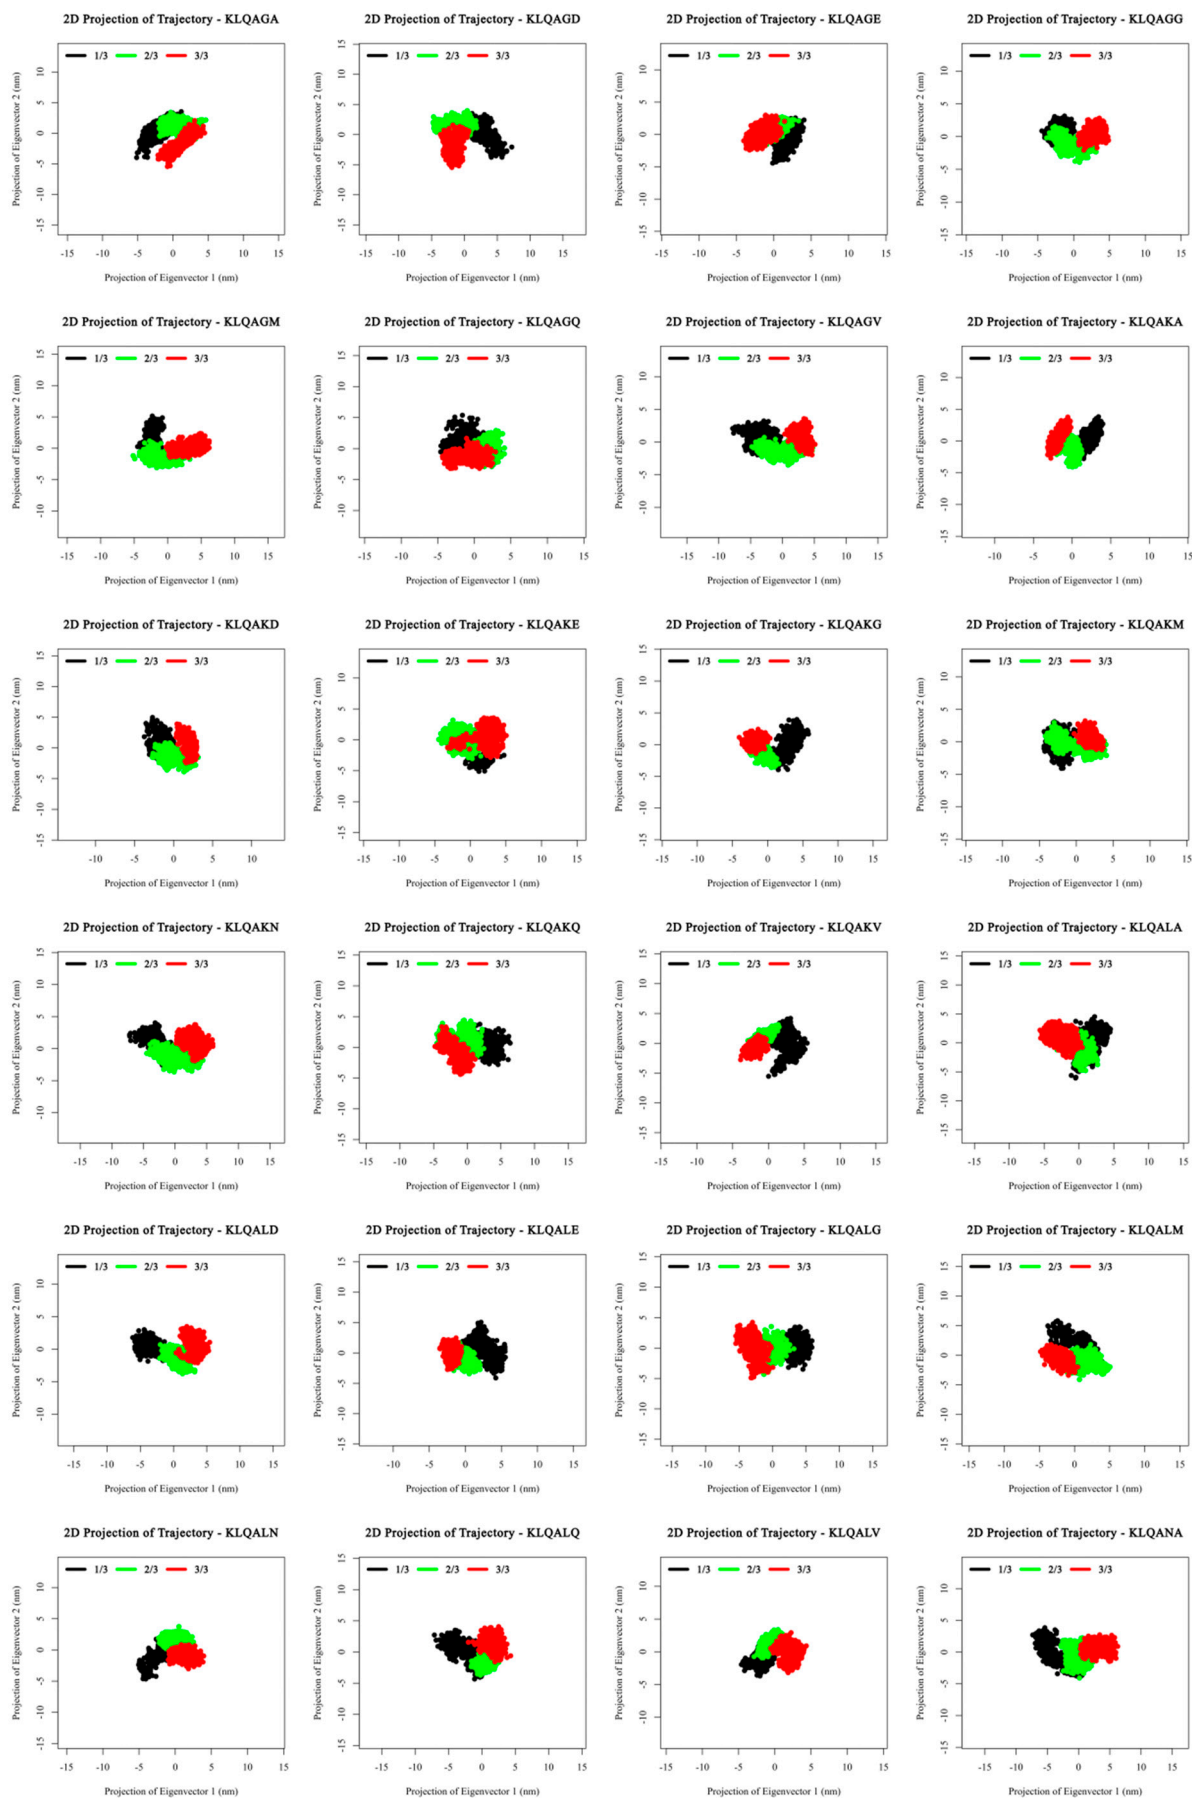



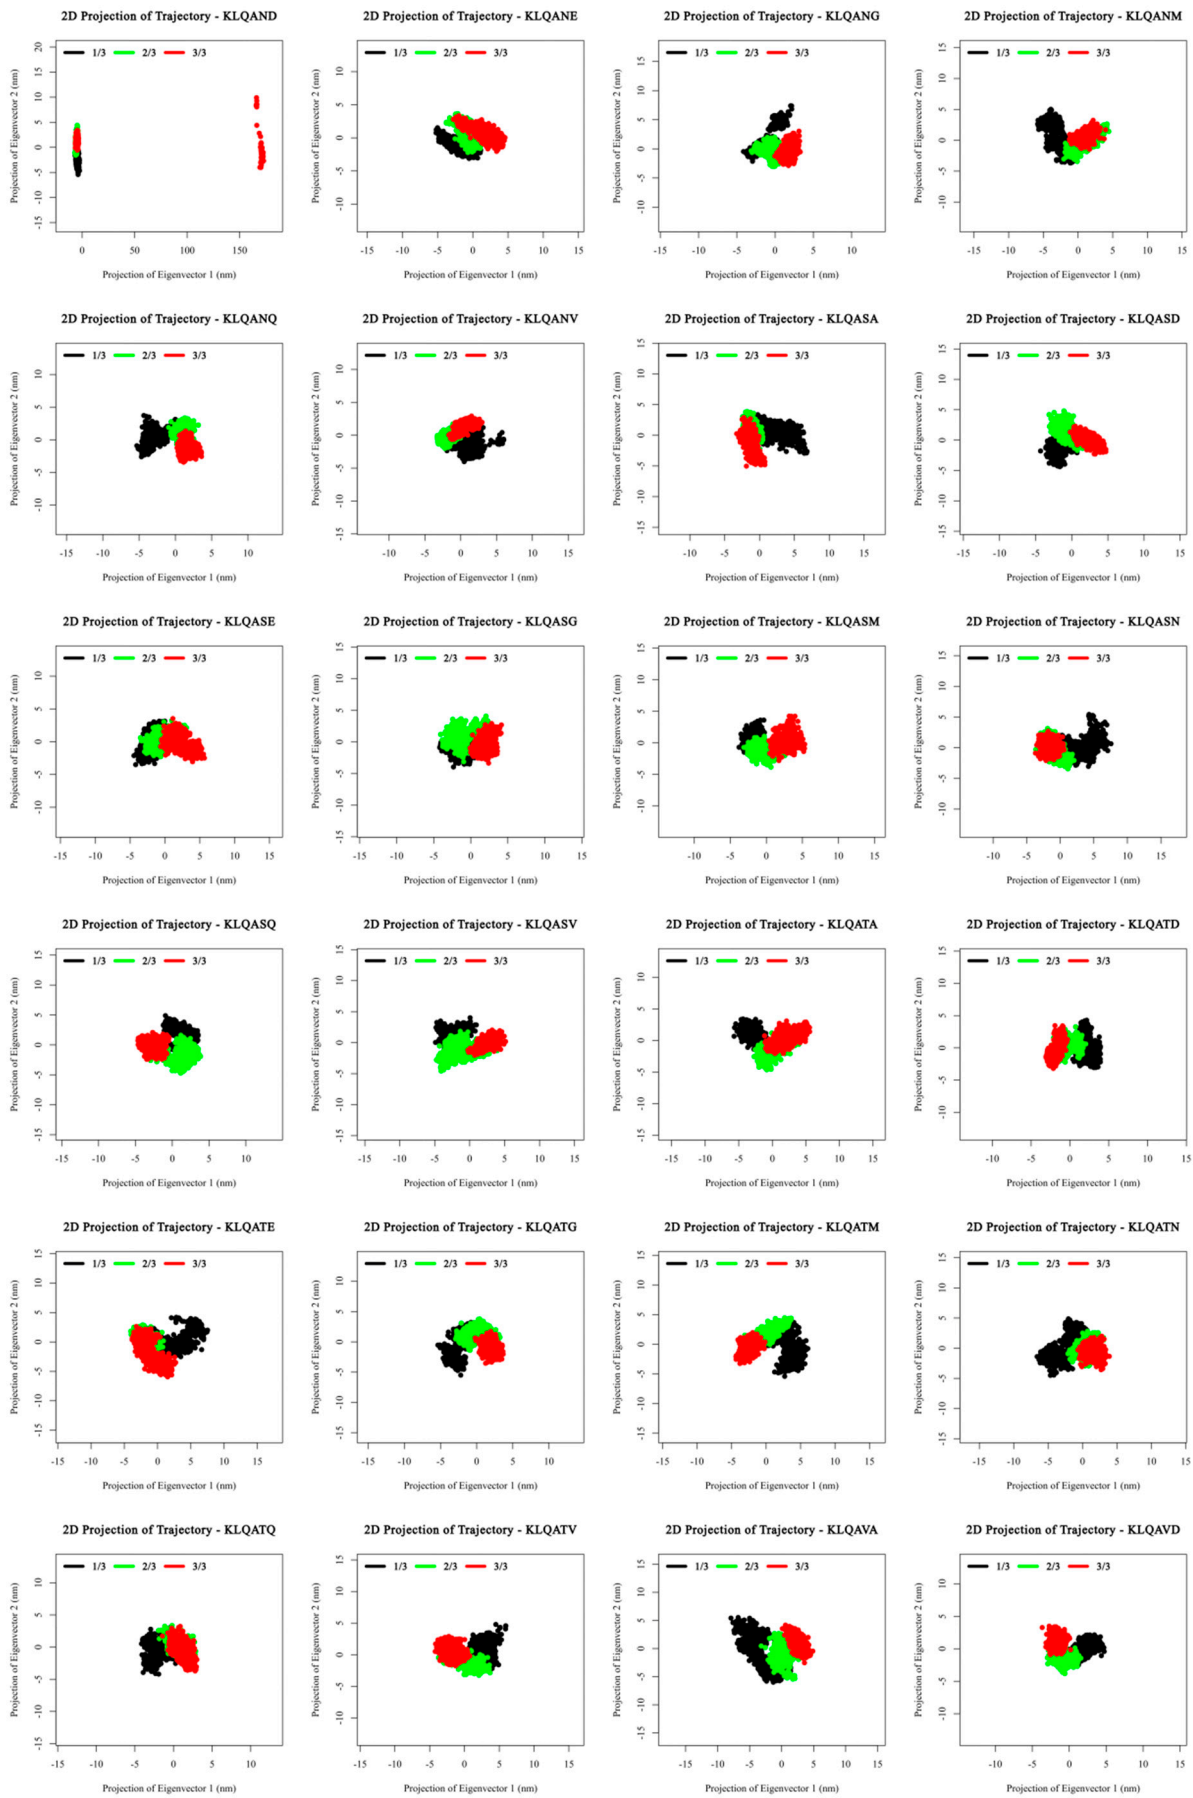

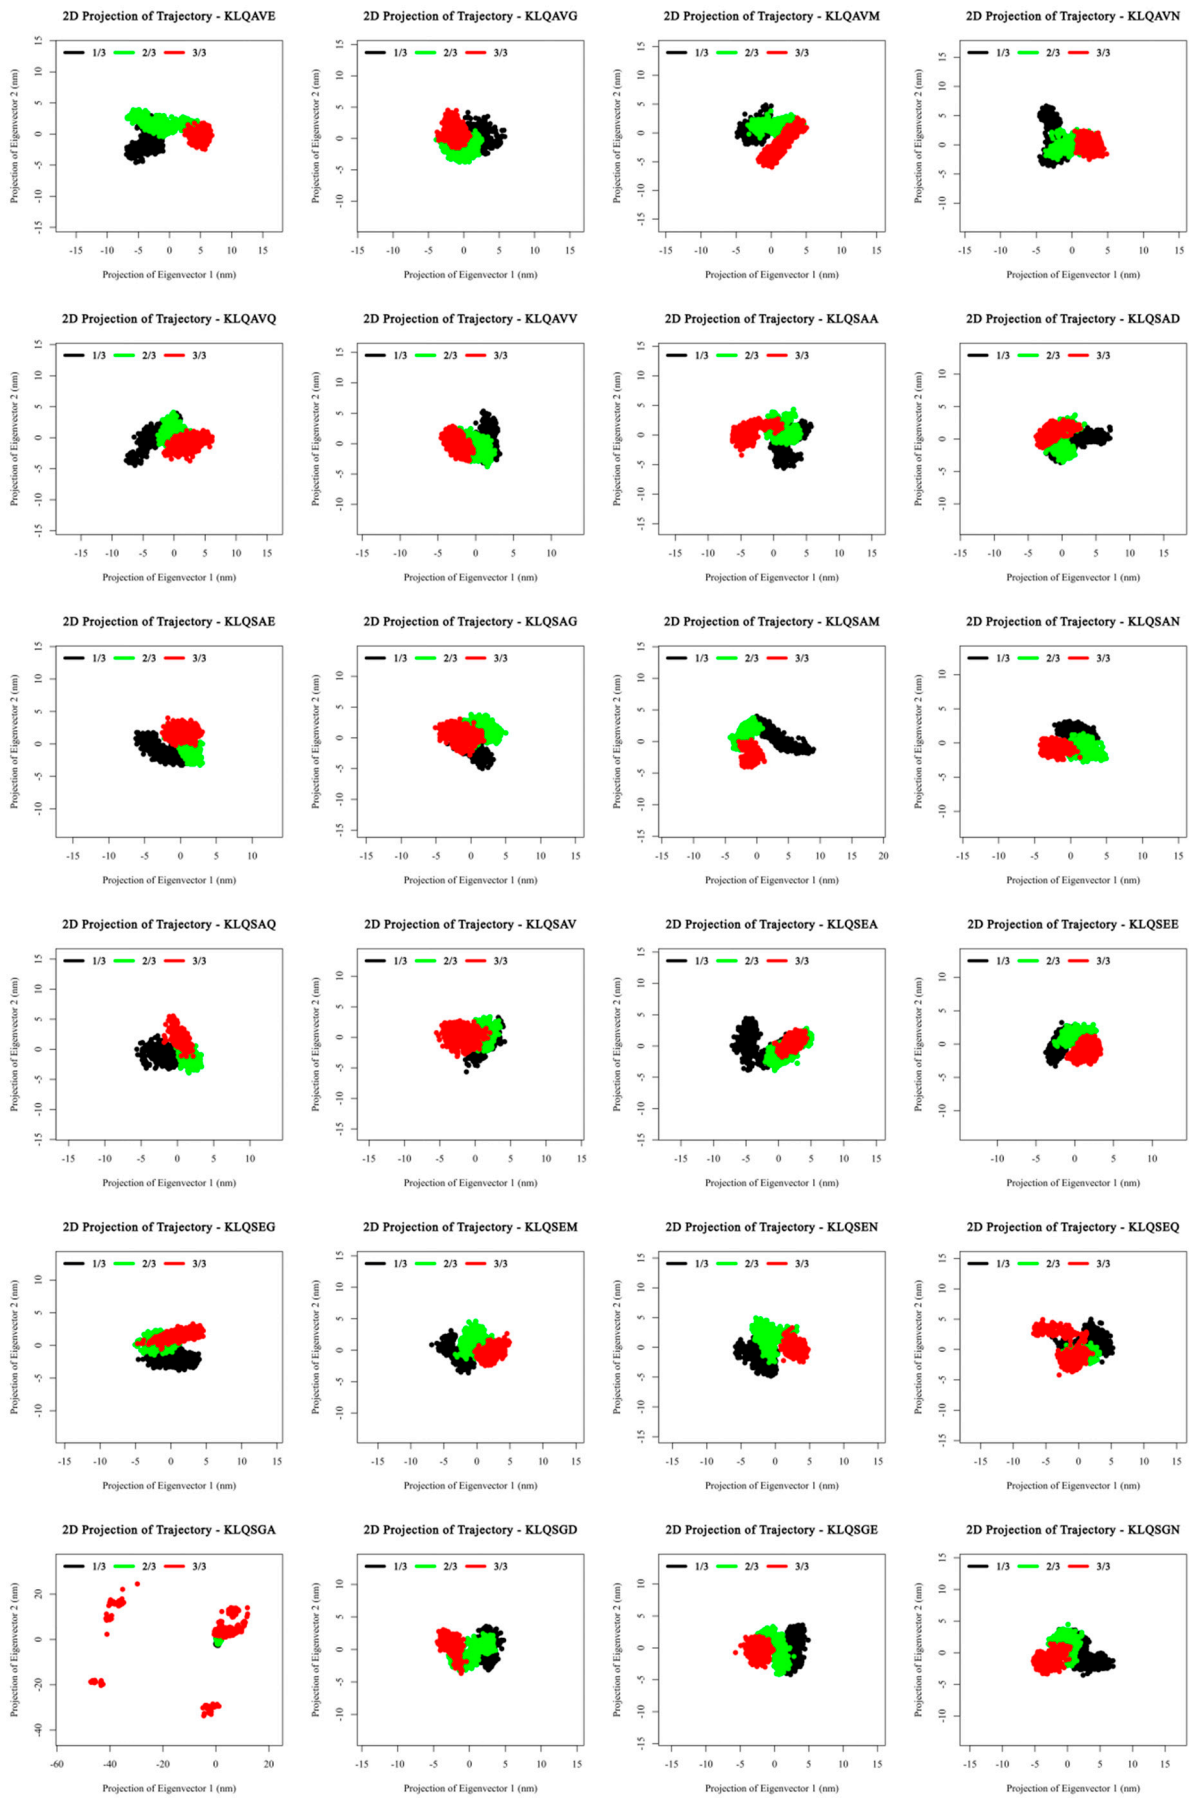

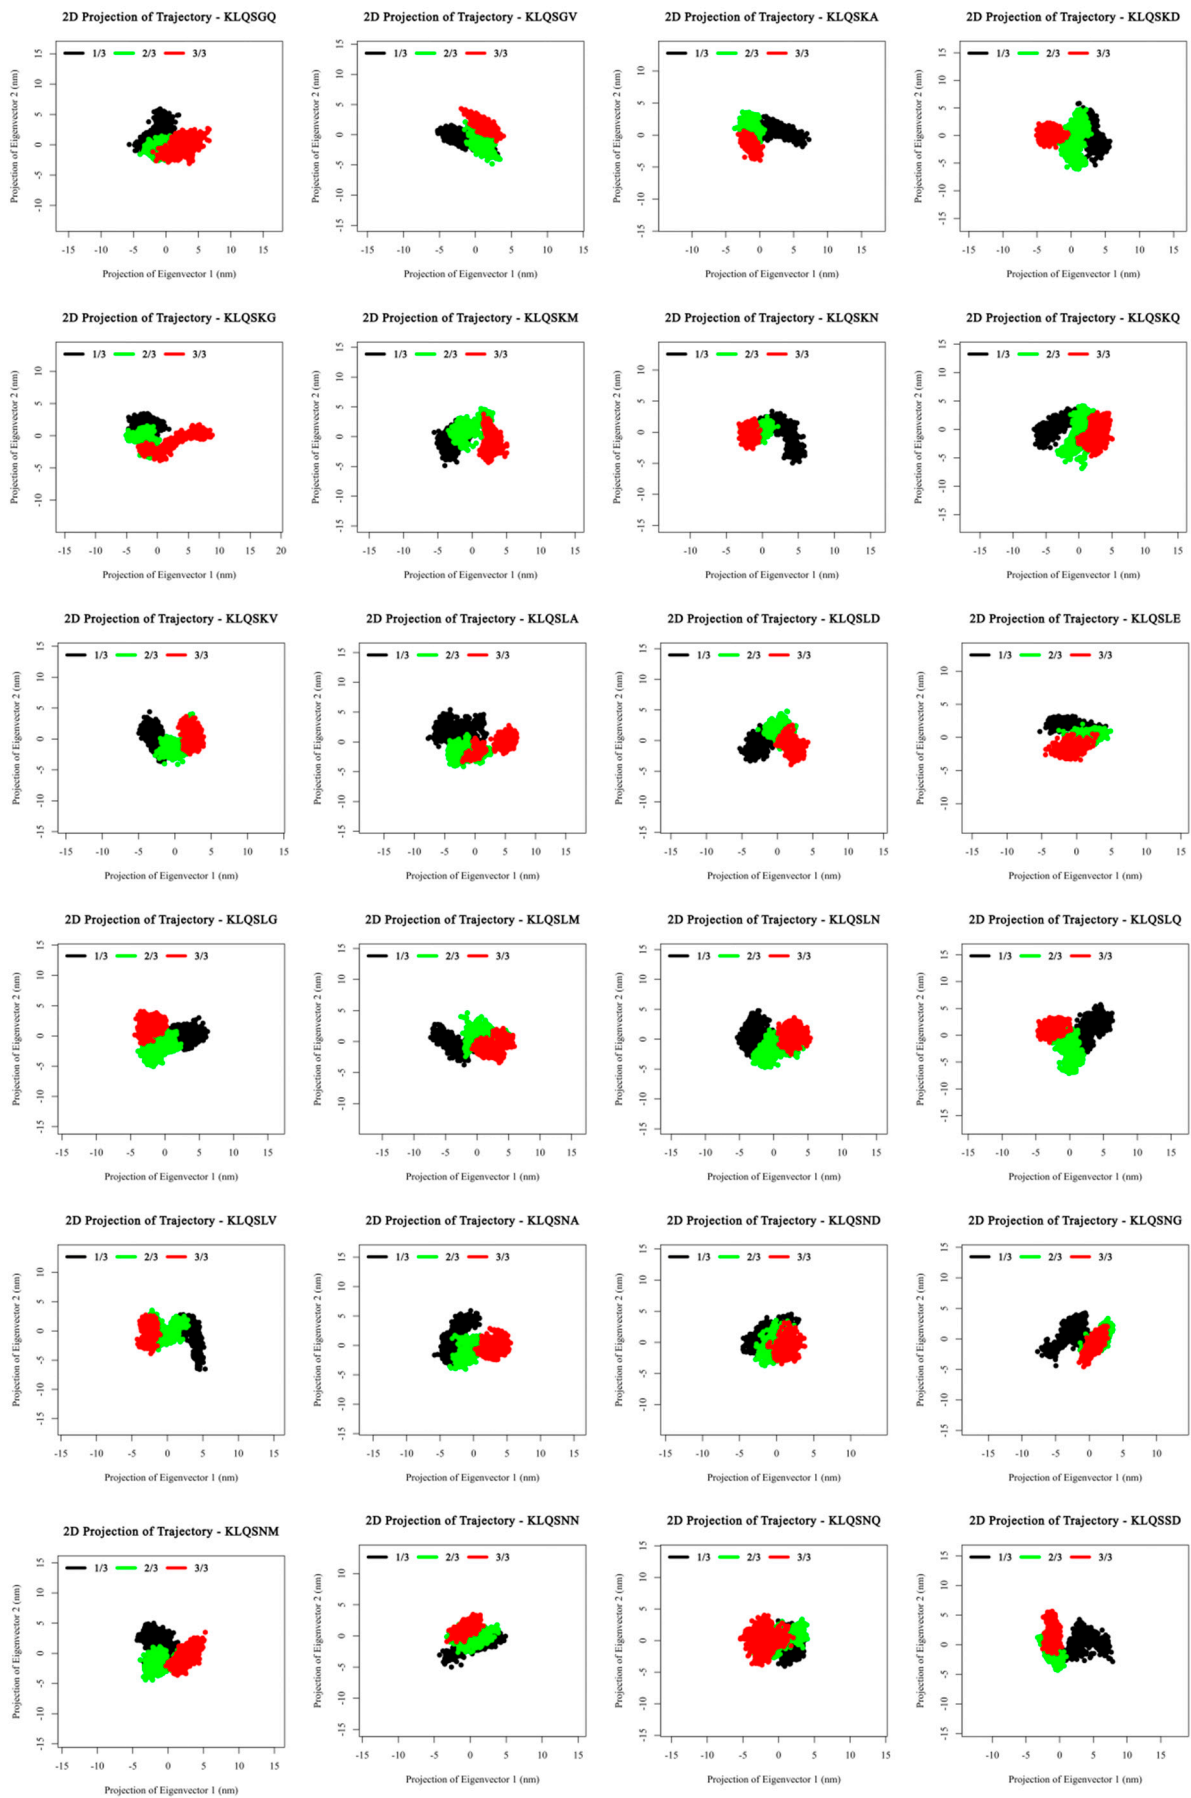



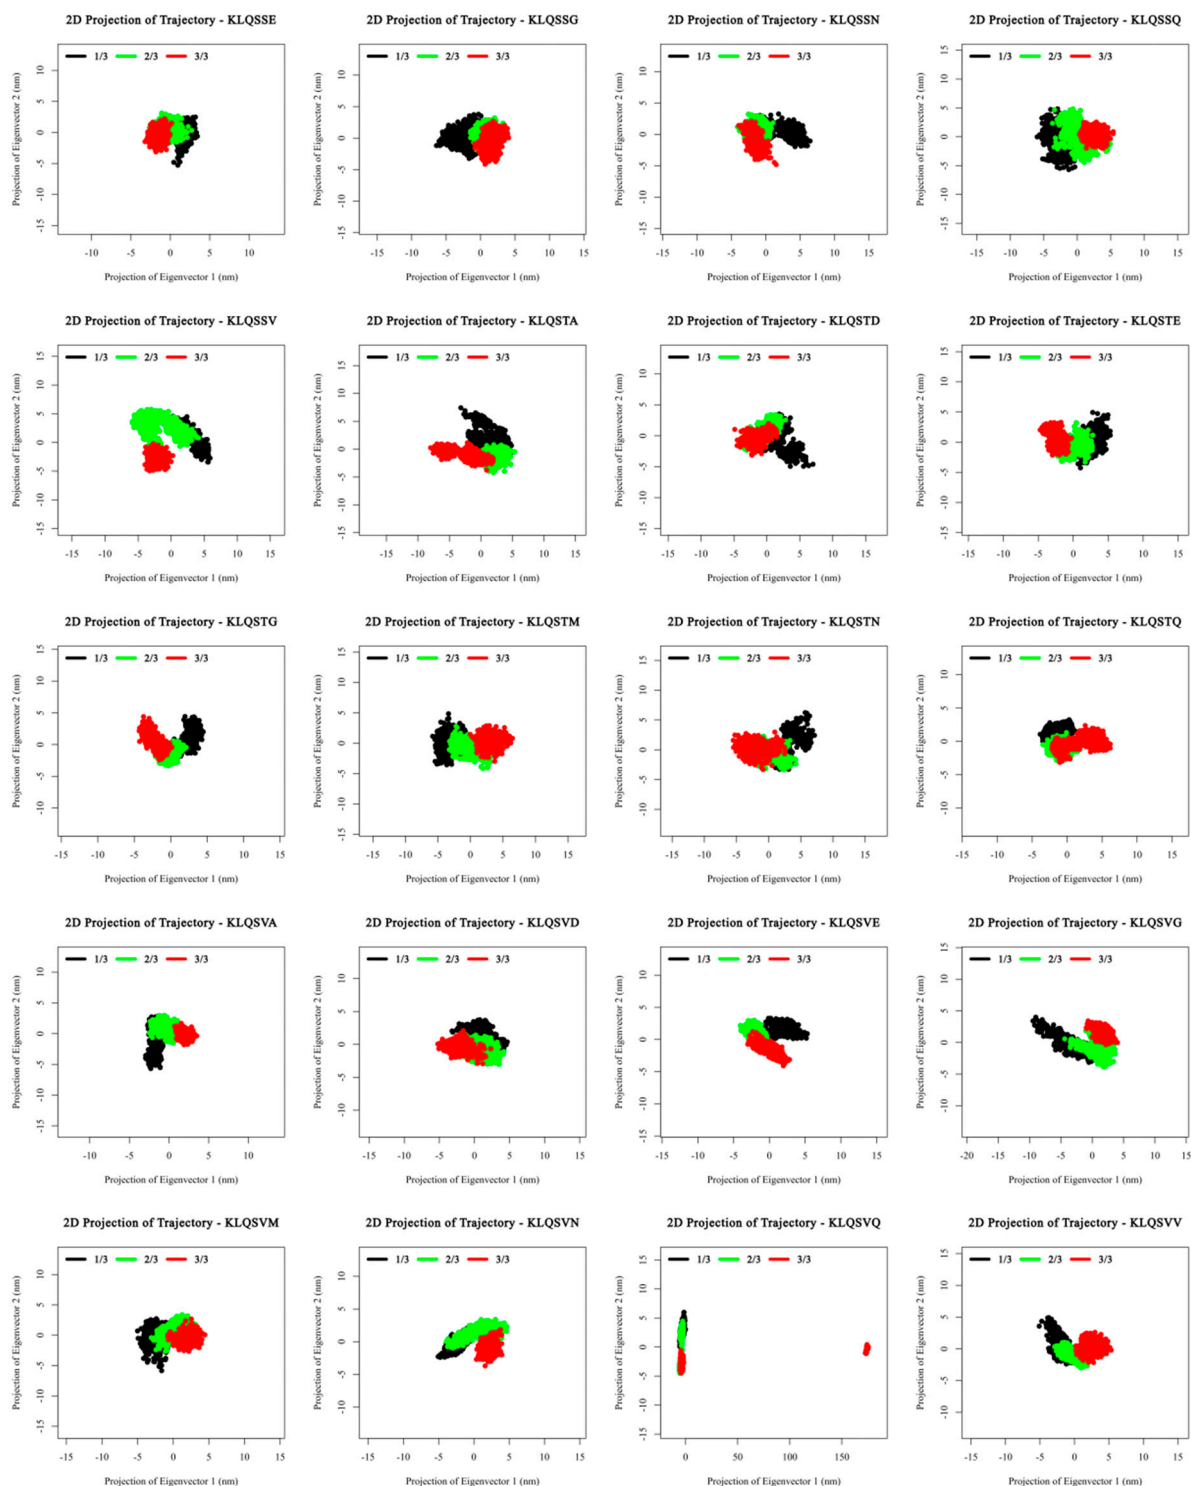

Supplementary Figure S8. The 2D projections of the principal components for  $M^{\text{pro}}$  (*apo* and KLQ\*\*\*-substrate-bound) systems over the duration of the 20 ns MD simulations. The projection of the motion along phase space for PC1 and PC2 of  $M^{\text{pro}}$  *apo* and KLQ\*\*\*-substrate-bound systems, showing the first third (black), second third (green) and final third (red) of the 20 ns simulation. Images were generated using Xmgrace (of Grace 5) and RStudio.

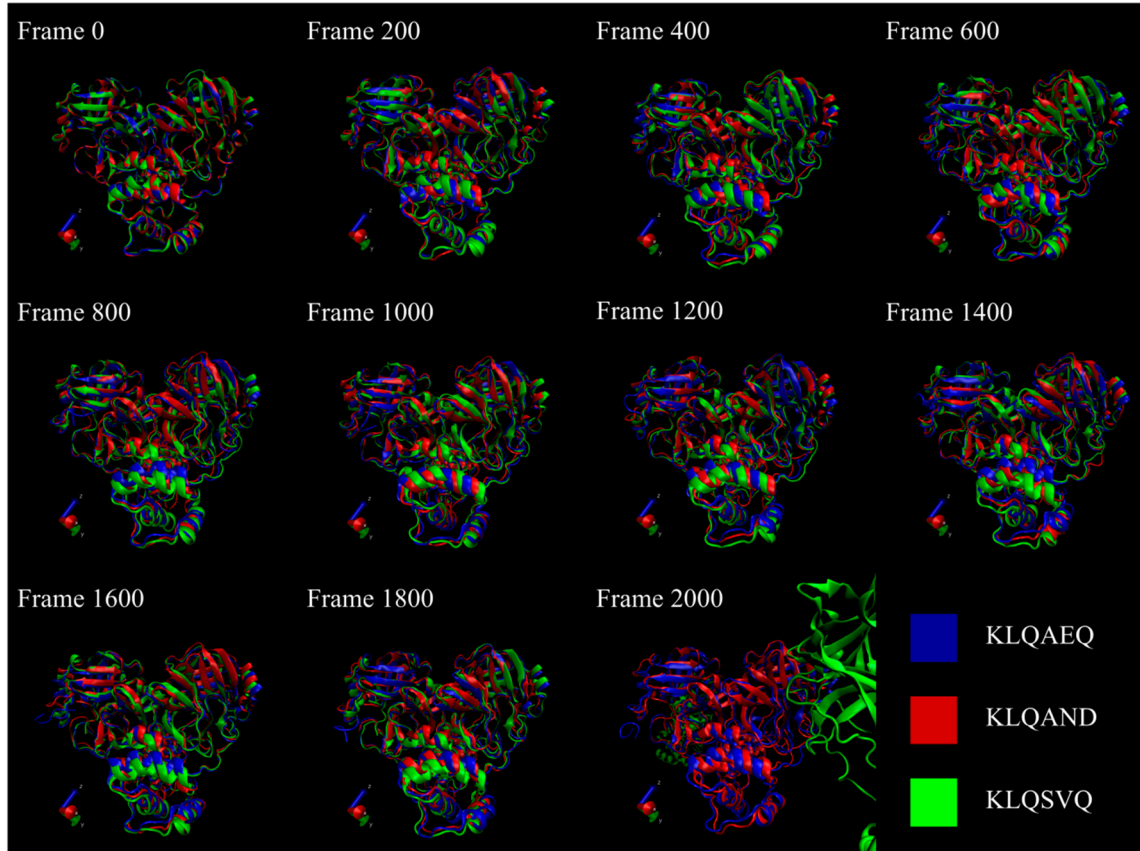

Supplementary Figure S9. Visualisation of the MD trajectories for Group 1 systems. Protein systems are shown cartoon representation, showing  $M^{\text{pro}}$ -KLQAEQ in blue;  $M^{\text{pro}}$ -KLQSVQ in red and  $M^{\text{pro}}$ -KLQAND in green. Images were generated using VMD.

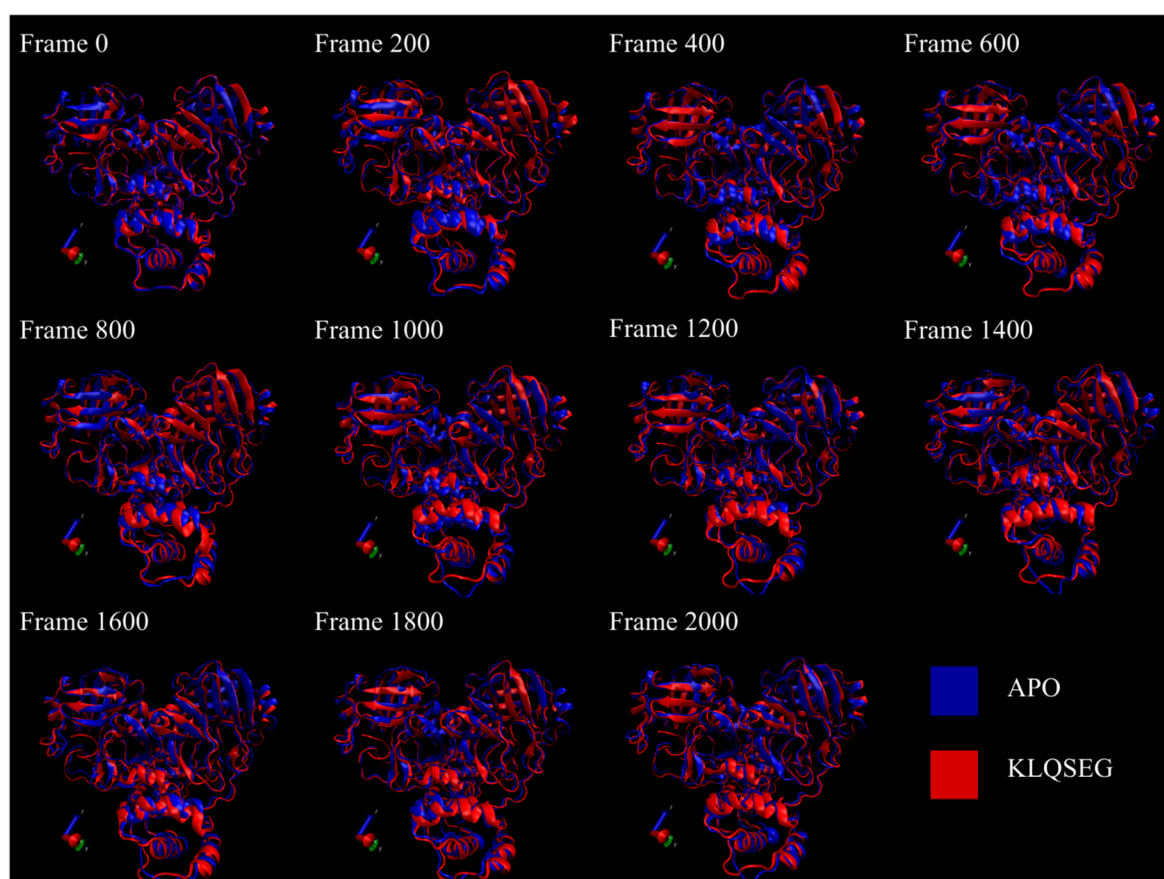

Supplementary Figure S10. Visualisation of the MD trajectories for Group 2 systems. Protein systems are shown cartoon representation, showing *apo*- $M^{\text{pro}}$  in blue; and  $M^{\text{pro}}$ -KLQSEG in red. Images were generated using VMD.

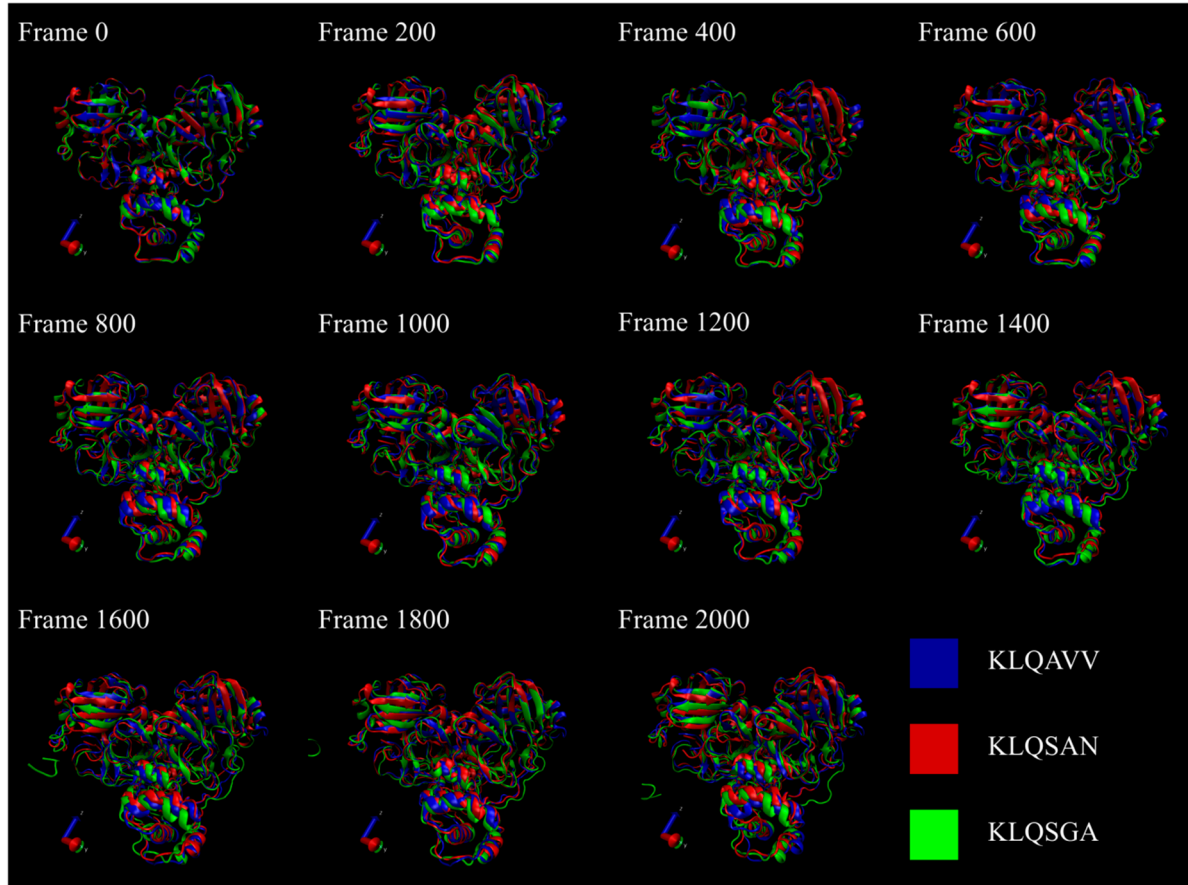

Supplementary Figure S11. Visualisation of the MD trajectories for Group 3 systems. Protein systems are shown cartoon representation, showing M<sup>pro</sup>-KLQAVV in blue; M<sup>pro</sup>-KLQSAN in red and M<sup>pro</sup>-KLQSGA in green. Images were generated using VMD.

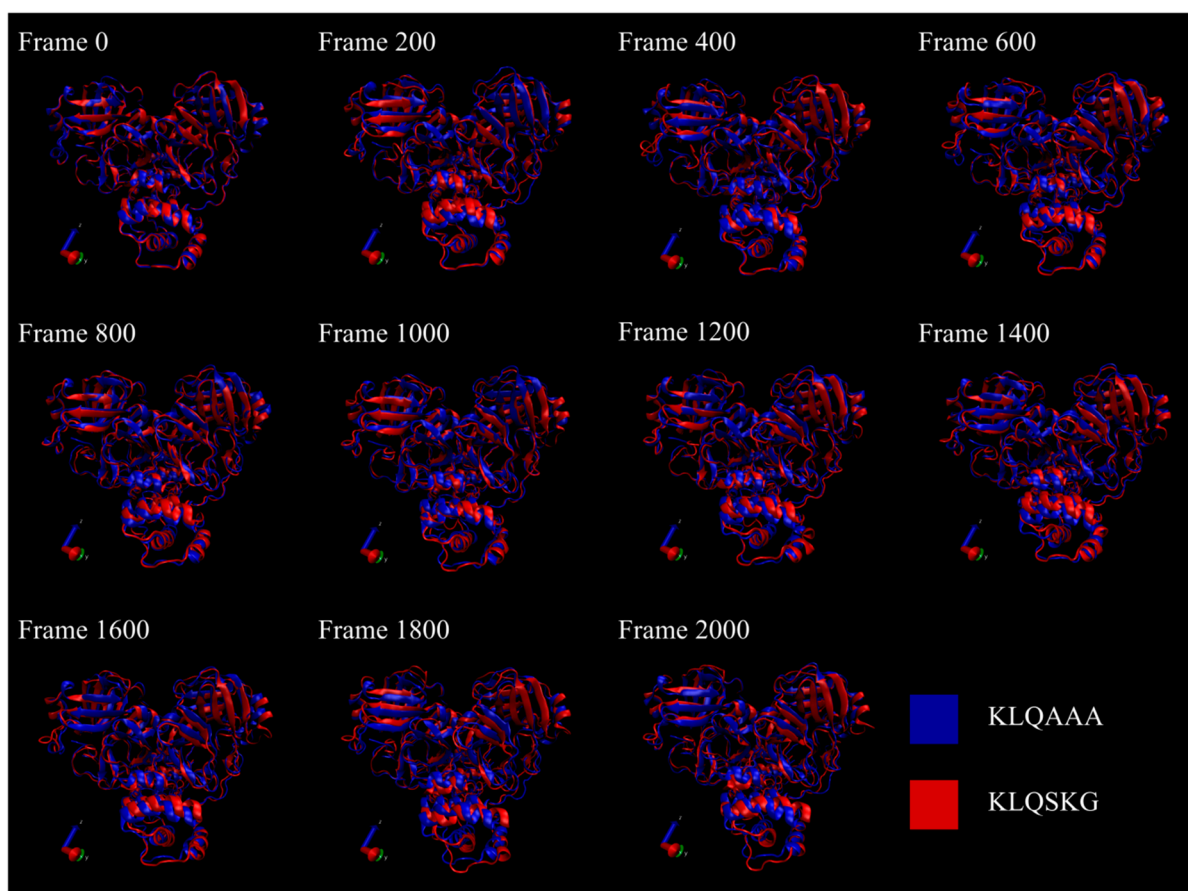

Supplementary Figure S12. Visualisation of the MD trajectories for Group 4 systems. Protein systems are shown cartoon representation, showing M<sup>pro</sup>-KLQAAA in blue and M<sup>pro</sup>-KLQSKG in red. Images were generated using VMD.



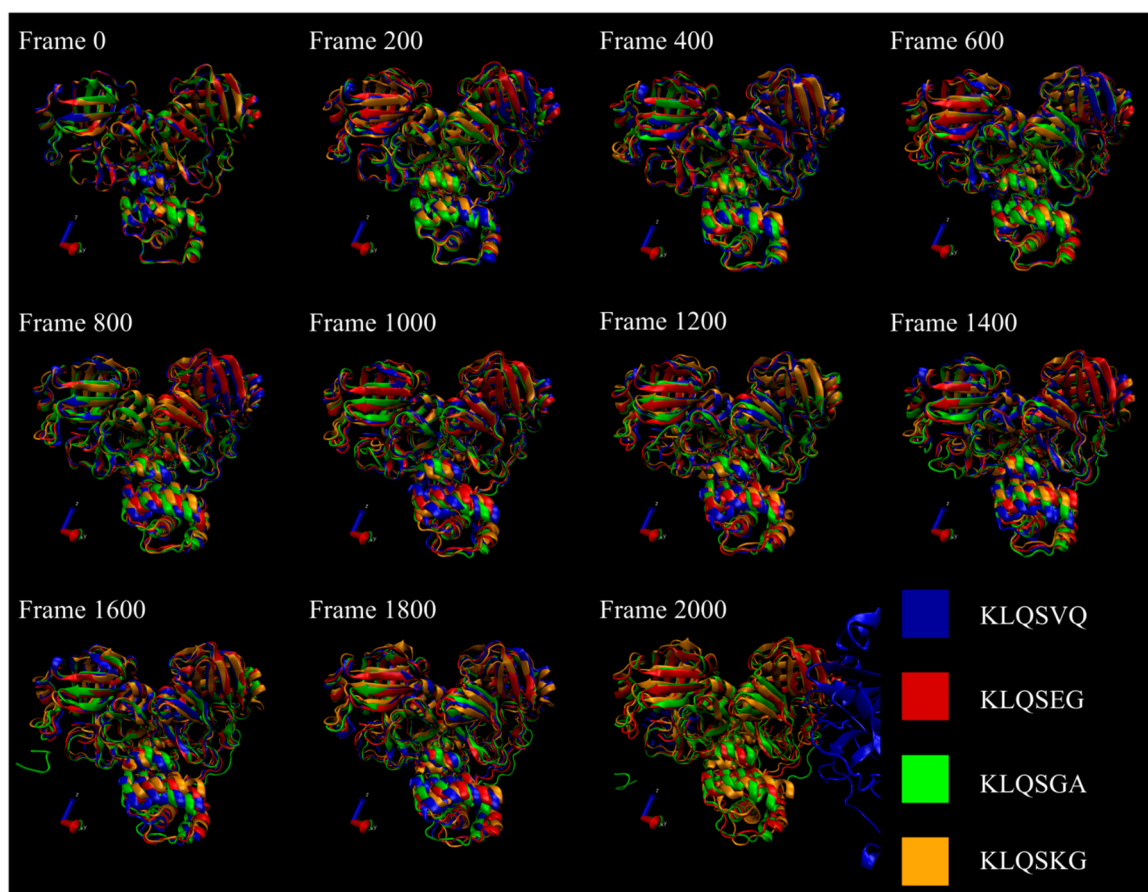

Supplementary Figure S13. Visualisation of the MD trajectories for systems in all hierarchical groups. Protein systems are shown cartoon representation, showing M<sup>pro</sup>-KLQSVQ (Group 1) in blue; M<sup>pro</sup>-KLQSEG (Group 2) in red; M<sup>pro</sup>-KLQSGA (Group 3) in green; and M<sup>pro</sup>-KLQSKG in orange. Images were generated using VMD.

Supplementary Table S2: RMSD from substrate dynamics ordered by Mean and ordered by Standard Deviation:

| RMSD sorted by mean |           |         |  |           |           | RMSD sorted by standard deviation |  |           |           |         |  |           |           |         |
|---------------------|-----------|---------|--|-----------|-----------|-----------------------------------|--|-----------|-----------|---------|--|-----------|-----------|---------|
| substrate           | mean (nm) | std-dev |  | substrate | mean (nm) | std-dev                           |  | substrate | mean (nm) | std-dev |  | substrate | mean (nm) | std-dev |
| KLQAKA              | 0.169     | 0.016   |  | KLQANM    | 0.204     | 0.028                             |  | KLQSAV    | 0.183     | 0.016   |  | KLQAAV    | 0.191     | 0.026   |
| KLQASG              | 0.171     | 0.018   |  | KLQSVA    | 0.204     | 0.022                             |  | KLQAKA    | 0.169     | 0.016   |  | KLQAGA    | 0.215     | 0.026   |
| KLQSND              | 0.172     | 0.020   |  | KLQSVD    | 0.204     | 0.022                             |  | KLQAAD    | 0.180     | 0.017   |  | KLQSNM    | 0.179     | 0.026   |
| KLQSVG              | 0.173     | 0.025   |  | KLQSKQ    | 0.204     | 0.039                             |  | KLQAGG    | 0.187     | 0.018   |  | KLQAEV    | 0.185     | 0.026   |
| KLQSNQ              | 0.173     | 0.019   |  | KLQAEM    | 0.205     | 0.020                             |  | KLQASG    | 0.171     | 0.018   |  | KLQSTQ    | 0.177     | 0.027   |
| KLQSSN              | 0.174     | 0.019   |  | KLQSSD    | 0.205     | 0.023                             |  | KLQAAN    | 0.175     | 0.018   |  | KLQAED    | 0.202     | 0.027   |
| KLQAAN              | 0.175     | 0.018   |  | KLQAEG    | 0.206     | 0.023                             |  | KLQSGV    | 0.208     | 0.018   |  | KLQATE    | 0.207     | 0.027   |
| KLQAAM              | 0.177     | 0.025   |  | APO       | 0.206     | 0.023                             |  | KLQSSE    | 0.189     | 0.019   |  | KLQSTG    | 0.192     | 0.027   |
| KLQSAN              | 0.177     | 0.023   |  | KLQSKN    | 0.206     | 0.028                             |  | KLQAKD    | 0.217     | 0.019   |  | KLQAAE    | 0.218     | 0.027   |
| KLQSTQ              | 0.177     | 0.027   |  | KLQSGN    | 0.206     | 0.036                             |  | KLQSNQ    | 0.173     | 0.019   |  | KLQAKM    | 0.196     | 0.027   |
| KLQSNM              | 0.179     | 0.026   |  | KLQSVV    | 0.207     | 0.033                             |  | KLQATQ    | 0.193     | 0.019   |  | KLQSGE    | 0.182     | 0.028   |
| KLQASD              | 0.179     | 0.020   |  | KLQSVN    | 0.207     | 0.025                             |  | KLQSSN    | 0.174     | 0.019   |  | KLQANM    | 0.204     | 0.028   |
| KLQSGD              | 0.179     | 0.023   |  | KLQATE    | 0.207     | 0.027                             |  | KLQSEE    | 0.190     | 0.019   |  | KLQSKN    | 0.206     | 0.028   |
| KLQATA              | 0.180     | 0.024   |  | KLQSGV    | 0.208     | 0.018                             |  | KLQSNN    | 0.193     | 0.020   |  | KLQAVN    | 0.216     | 0.028   |
| KLQAAD              | 0.180     | 0.017   |  | KLQAKV    | 0.209     | 0.022                             |  | KLQSTD    | 0.203     | 0.020   |  | KLQSSG    | 0.216     | 0.028   |
| KLQSGQ              | 0.181     | 0.023   |  | KLQAEV    | 0.209     | 0.029                             |  | KLQATN    | 0.197     | 0.020   |  | KLQSNG    | 0.228     | 0.028   |
| KLQATD              | 0.181     | 0.021   |  | KLQANQ    | 0.209     | 0.025                             |  | KLQSND    | 0.172     | 0.020   |  | KLQSLD    | 0.188     | 0.028   |
| KLQSLE              | 0.181     | 0.024   |  | KLQAAG    | 0.209     | 0.023                             |  | KLQAVD    | 0.187     | 0.020   |  | KLQALA    | 0.224     | 0.029   |
| KLQSGE              | 0.182     | 0.028   |  | KLQALE    | 0.209     | 0.025                             |  | KLQAEM    | 0.205     | 0.020   |  | KLQAEV    | 0.209     | 0.029   |
| KLQSAV              | 0.183     | 0.016   |  | KLQATM    | 0.209     | 0.024                             |  | KLQASD    | 0.179     | 0.020   |  | KLQAKE    | 0.198     | 0.029   |
| KLQSTE              | 0.183     | 0.024   |  | KLQSKM    | 0.211     | 0.033                             |  | KLQAGE    | 0.184     | 0.021   |  | KLQASA    | 0.227     | 0.030   |
| KLQAGE              | 0.184     | 0.021   |  | KLQALD    | 0.211     | 0.040                             |  | KLQASE    | 0.192     | 0.021   |  | KLQAAA    | 0.192     | 0.030   |
| KLQAAQ              | 0.184     | 0.024   |  | KLQSKV    | 0.213     | 0.030                             |  | KLQATD    | 0.181     | 0.021   |  | KLQALM    | 0.217     | 0.030   |
| KLQAEV              | 0.185     | 0.026   |  | KLQANE    | 0.214     | 0.025                             |  | KLQASV    | 0.186     | 0.021   |  | KLQSKV    | 0.213     | 0.030   |
| KLQASV              | 0.186     | 0.021   |  | KLQAKN    | 0.214     | 0.036                             |  | KLQSVM    | 0.189     | 0.021   |  | KLQSEM    | 0.224     | 0.030   |
| KLQAGG              | 0.187     | 0.018   |  | KLQASN    | 0.214     | 0.031                             |  | KLQSEG    | 0.187     | 0.021   |  | KLQSEN    | 0.225     | 0.030   |

|        |       |       |         |       |       |         |       |       |         |       |       |
|--------|-------|-------|---------|-------|-------|---------|-------|-------|---------|-------|-------|
| KLQSEG | 0.187 | 0.021 | KLQAGA  | 0.215 | 0.026 | KLQSVD  | 0.204 | 0.022 | KLQASN  | 0.214 | 0.031 |
| KLQSLN | 0.187 | 0.023 | KLQANV  | 0.215 | 0.023 | KLQSVA  | 0.204 | 0.022 | KLQSSV  | 0.247 | 0.031 |
| KLQAVD | 0.187 | 0.020 | KLQSSG  | 0.216 | 0.028 | KLQSAQ  | 0.201 | 0.022 | KLQAGM  | 0.193 | 0.032 |
| KLQSLD | 0.188 | 0.028 | KLQAVN  | 0.216 | 0.028 | KLQSAE  | 0.195 | 0.022 | KLQSKD  | 0.222 | 0.032 |
| KLQSAG | 0.188 | 0.024 | KLQALM  | 0.217 | 0.030 | KLQAKV  | 0.209 | 0.022 | KLQALG  | 0.204 | 0.032 |
| KLQSVM | 0.189 | 0.021 | KLQSEQ  | 0.217 | 0.033 | KLQAKQ  | 0.194 | 0.023 | KLQSKA  | 0.222 | 0.032 |
| KLQSSE | 0.189 | 0.019 | KLQSSQ  | 0.217 | 0.033 | KLQSGD  | 0.179 | 0.023 | KLQSLV  | 0.232 | 0.032 |
| KLQSEE | 0.190 | 0.019 | KLQAKD  | 0.217 | 0.019 | KLQSGQ  | 0.181 | 0.023 | KLQSDAD | 0.229 | 0.033 |
| KLQASM | 0.190 | 0.024 | KLQSLG  | 0.218 | 0.033 | KLQANV  | 0.215 | 0.023 | KLQSSQ  | 0.217 | 0.033 |
| KLQSVE | 0.190 | 0.025 | KLQAAE  | 0.218 | 0.027 | KLQSLN  | 0.187 | 0.023 | KLQSLG  | 0.218 | 0.033 |
| KLQAAV | 0.191 | 0.026 | KLQANA  | 0.218 | 0.050 | APO     | 0.206 | 0.023 | KLQSEQ  | 0.217 | 0.033 |
| KLQAAA | 0.192 | 0.030 | KLQSKA  | 0.222 | 0.032 | KLQAAAG | 0.209 | 0.023 | KLQATV  | 0.226 | 0.033 |
| KLQASE | 0.192 | 0.021 | KLQSEA  | 0.222 | 0.041 | KLQAKG  | 0.194 | 0.023 | KLQSTA  | 0.242 | 0.033 |
| KLQAGQ | 0.192 | 0.025 | KLQSKD  | 0.222 | 0.032 | KLQAEQ  | 0.206 | 0.023 | KLQSKM  | 0.211 | 0.033 |
| KLQSTG | 0.192 | 0.027 | KLQALV  | 0.223 | 0.024 | KLQALN  | 0.224 | 0.023 | KLQSVV  | 0.207 | 0.033 |
| KLQSTM | 0.193 | 0.040 | KLQALN  | 0.224 | 0.023 | KLQSAN  | 0.177 | 0.023 | KLQSAM  | 0.230 | 0.035 |
| KLQAGM | 0.193 | 0.032 | KLQSEM  | 0.224 | 0.030 | KLQSSD  | 0.205 | 0.023 | KLQSGN  | 0.206 | 0.036 |
| KLQSNN | 0.193 | 0.020 | KLQALA  | 0.224 | 0.029 | KLQASM  | 0.190 | 0.024 | KLQAEA  | 0.194 | 0.036 |
| KLQATQ | 0.193 | 0.019 | KLQSEN  | 0.225 | 0.030 | KLQALV  | 0.223 | 0.024 | KLQAKN  | 0.214 | 0.036 |
| KLQAKQ | 0.194 | 0.023 | KLQATV  | 0.226 | 0.033 | KLQATM  | 0.209 | 0.024 | KLQSNA  | 0.226 | 0.036 |
| KLQAVM | 0.194 | 0.024 | KLQSNA  | 0.226 | 0.036 | KLQAVM  | 0.194 | 0.024 | KLQSTN  | 0.244 | 0.037 |
| KLQAEA | 0.194 | 0.036 | KLQASA  | 0.227 | 0.030 | KLQANG  | 0.227 | 0.024 | KLQSLQ  | 0.233 | 0.037 |
| KLQAKG | 0.194 | 0.023 | KLQANG  | 0.227 | 0.024 | KLQSAG  | 0.188 | 0.024 | KLQSKQ  | 0.204 | 0.039 |
| KLQSLM | 0.194 | 0.043 | KLQSNG  | 0.228 | 0.028 | KLQSLE  | 0.181 | 0.024 | KLQALD  | 0.211 | 0.040 |
| KLQSAE | 0.195 | 0.022 | KLQSDAD | 0.229 | 0.033 | KLQALQ  | 0.202 | 0.024 | KLQAGD  | 0.244 | 0.040 |
| KLQAKM | 0.196 | 0.027 | KLQSAM  | 0.230 | 0.035 | KLQAVV  | 0.200 | 0.024 | KLQSTM  | 0.193 | 0.040 |
| KLQSKG | 0.196 | 0.051 | KLQSLV  | 0.232 | 0.032 | KLQAAQ  | 0.184 | 0.024 | KLQSAA  | 0.203 | 0.041 |
| KLQATN | 0.197 | 0.020 | KLQSLQ  | 0.233 | 0.037 | KLQASQ  | 0.199 | 0.024 | KLQSEA  | 0.222 | 0.041 |
| KLQAKE | 0.198 | 0.029 | KLQSGA  | 0.238 | 0.187 | KLQSTE  | 0.183 | 0.024 | KLQAVQ  | 0.240 | 0.042 |
| KLQASQ | 0.199 | 0.024 | KLQAVQ  | 0.240 | 0.042 | KLQATA  | 0.180 | 0.024 | KLQAVA  | 0.267 | 0.043 |
| KLQAVV | 0.200 | 0.024 | KLQSTA  | 0.242 | 0.033 | KLQAGQ  | 0.192 | 0.025 | KLQSLM  | 0.194 | 0.043 |
| KLQATG | 0.200 | 0.025 | KLQAGD  | 0.244 | 0.040 | KLQSVE  | 0.190 | 0.025 | KLQAGV  | 0.259 | 0.049 |



|        |       |       |  |        |       |       |  |        |       |       |  |        |       |       |
|--------|-------|-------|--|--------|-------|-------|--|--------|-------|-------|--|--------|-------|-------|
| KLQSAQ | 0.201 | 0.022 |  | KLQSTN | 0.244 | 0.037 |  | KLQALE | 0.209 | 0.025 |  | KLQAEQ | 0.201 | 0.050 |
| KLQAEQ | 0.201 | 0.050 |  | KLQAVE | 0.245 | 0.063 |  | KLQSVN | 0.207 | 0.025 |  | KLQANA | 0.218 | 0.050 |
| KLQALQ | 0.202 | 0.024 |  | KLQSSV | 0.247 | 0.031 |  | KLQAVG | 0.203 | 0.025 |  | KLQSKG | 0.196 | 0.051 |
| KLQAED | 0.202 | 0.027 |  | KLQSLA | 0.251 | 0.057 |  | KLQSVG | 0.173 | 0.025 |  | KLQSLA | 0.251 | 0.057 |
| KLQSTD | 0.203 | 0.020 |  | KLQAGV | 0.259 | 0.049 |  | KLQANE | 0.214 | 0.025 |  | KLQAVE | 0.245 | 0.063 |
| KLQSAA | 0.203 | 0.041 |  | KLQAVA | 0.267 | 0.043 |  | KLQAAM | 0.177 | 0.025 |  | KLQSGA | 0.238 | 0.187 |
| KLQAVG | 0.203 | 0.025 |  | KLQSVQ | 0.271 | 0.564 |  | KLQATG | 0.200 | 0.025 |  | KLQSVQ | 0.271 | 0.564 |
| KLQALG | 0.204 | 0.032 |  | KLQAND | 0.320 | 0.636 |  | KLQANQ | 0.209 | 0.025 |  | KLQAND | 0.320 | 0.636 |

Supplementary Table S3: Rg from substrate dynamics ordered by Mean and ordered by Standard Deviation:

| Rg sorted by mean |           |         |  |           |           | Rg sorted by standard deviation |  |           |           |         |  |           |           |         |
|-------------------|-----------|---------|--|-----------|-----------|---------------------------------|--|-----------|-----------|---------|--|-----------|-----------|---------|
| substrate         | mean (nm) | std-dev |  | substrate | mean (nm) | std-dev                         |  | substrate | mean (nm) | std-dev |  | substrate | mean (nm) | std-dev |
| KLQSAM            | 2.5704    | 0.0146  |  | KLQALD    | 2.5923    | 0.0082                          |  | KLQAAG    | 2.5911    | 0.0072  |  | KLQAAM    | 2.5885    | 0.0093  |
| KLQAAD            | 2.5740    | 0.0125  |  | APO       | 2.5924    | 0.0089                          |  | KLQAGG    | 2.5856    | 0.0072  |  | KLQAVN    | 2.5898    | 0.0093  |
| KLQANG            | 2.5743    | 0.0095  |  | KLQAVV    | 2.5925    | 0.0084                          |  | KLQSVD    | 2.5940    | 0.0073  |  | KLQSAV    | 2.5913    | 0.0094  |
| KLQSEA            | 2.5749    | 0.0127  |  | KLQSVM    | 2.5925    | 0.0083                          |  | KLQSVV    | 2.5995    | 0.0073  |  | KLQSKG    | 2.5973    | 0.0094  |
| KLQALV            | 2.5752    | 0.0102  |  | KLQASE    | 2.5925    | 0.0078                          |  | KLQSKV    | 2.5928    | 0.0074  |  | KLQSGN    | 2.5939    | 0.0094  |
| KLQSLA            | 2.5760    | 0.0154  |  | KLQSVE    | 2.5927    | 0.0078                          |  | KLQAGA    | 2.5895    | 0.0074  |  | KLQAEM    | 2.5885    | 0.0094  |
| KLQSEN            | 2.5764    | 0.0104  |  | KLQSKV    | 2.5928    | 0.0074                          |  | KLQSDN    | 2.5962    | 0.0074  |  | KLQSTD    | 2.5852    | 0.0094  |
| KLQSSN            | 2.5788    | 0.0102  |  | KLQASM    | 2.5928    | 0.0090                          |  | KLQSNN    | 2.5936    | 0.0075  |  | KLQALM    | 2.5987    | 0.0094  |
| KLQAKN            | 2.5798    | 0.0118  |  | KLQSTN    | 2.5930    | 0.0091                          |  | KLQAKG    | 2.5905    | 0.0075  |  | KLQANG    | 2.5743    | 0.0095  |
| KLQAGQ            | 2.5804    | 0.0083  |  | KLQAAQ    | 2.5934    | 0.0079                          |  | KLQAKV    | 2.5905    | 0.0076  |  | KLQSLD    | 2.5905    | 0.0095  |
| KLQAKE            | 2.5812    | 0.0093  |  | KLQAKA    | 2.5934    | 0.0086                          |  | KLQAVG    | 2.6046    | 0.0077  |  | KLQAEA    | 2.5895    | 0.0096  |
| KLQATG            | 2.5813    | 0.0101  |  | KLQATD    | 2.5935    | 0.0082                          |  | KLQASE    | 2.5925    | 0.0078  |  | KLQATV    | 2.5854    | 0.0097  |
| KLQSLE            | 2.5817    | 0.0101  |  | KLQSSV    | 2.5936    | 0.0116                          |  | KLQSVE    | 2.5927    | 0.0078  |  | KLQSLQ    | 2.5956    | 0.0099  |
| KLQAGD            | 2.5821    | 0.0110  |  | KLQSNN    | 2.5936    | 0.0075                          |  | KLQATQ    | 2.5973    | 0.0078  |  | KLQATG    | 2.5813    | 0.0101  |
| KLQAGM            | 2.5821    | 0.0112  |  | KLQSLV    | 2.5936    | 0.0102                          |  | KLQSGD    | 2.6039    | 0.0078  |  | KLQSLE    | 2.5817    | 0.0101  |
| KLQANE            | 2.5826    | 0.0091  |  | KLQAKD    | 2.5937    | 0.0091                          |  | KLQAAQ    | 2.5934    | 0.0079  |  | KLQSSD    | 2.5953    | 0.0101  |
| KLQAKQ            | 2.5828    | 0.0117  |  | KLQAEQ    | 2.5938    | 0.0089                          |  | KLQSAG    | 2.6001    | 0.0080  |  | KLQSLV    | 2.5936    | 0.0102  |
| KLQALQ            | 2.5830    | 0.0092  |  | KLQSGN    | 2.5939    | 0.0094                          |  | KLQASG    | 2.6034    | 0.0080  |  | KLQSTE    | 2.5915    | 0.0102  |
| KLQSEM            | 2.5831    | 0.0084  |  | KLQSVD    | 2.5940    | 0.0073                          |  | KLQSEE    | 2.5984    | 0.0080  |  | KLQSSN    | 2.5788    | 0.0102  |
| KLQANM            | 2.5839    | 0.0087  |  | KLQAAA    | 2.5940    | 0.0121                          |  | KLQSGE    | 2.6007    | 0.0081  |  | KLQAKM    | 2.6036    | 0.0102  |
| KLQATN            | 2.5842    | 0.0132  |  | KLQSGV    | 2.5951    | 0.0087                          |  | KLQSNG    | 2.5953    | 0.0082  |  | KLQALV    | 2.5752    | 0.0102  |
| KLQSNA            | 2.5842    | 0.0110  |  | KLQSNG    | 2.5953    | 0.0082                          |  | KLQAED    | 2.5889    | 0.0082  |  | KLQSVN    | 2.5845    | 0.0103  |
| KLQSAD            | 2.5845    | 0.0087  |  | KLQSSD    | 2.5953    | 0.0101                          |  | KLQATD    | 2.5935    | 0.0082  |  | KLQSNQ    | 2.5958    | 0.0103  |
| KLQSVN            | 2.5845    | 0.0103  |  | KLQSKM    | 2.5954    | 0.0127                          |  | KLQALG    | 2.6041    | 0.0082  |  | KLQASA    | 2.5979    | 0.0103  |
| KLQAVM            | 2.5845    | 0.0116  |  | KLQSKQ    | 2.5955    | 0.0093                          |  | KLQALD    | 2.5923    | 0.0082  |  | KLQSEN    | 2.5764    | 0.0104  |
| KLQSKA            | 2.5845    | 0.0083  |  | KLQATA    | 2.5955    | 0.0109                          |  | KLQAGQ    | 2.5804    | 0.0083  |  | KLQANA    | 2.5986    | 0.0105  |

|        |        |        |  |        |        |        |  |        |        |        |  |        |        |        |
|--------|--------|--------|--|--------|--------|--------|--|--------|--------|--------|--|--------|--------|--------|
| KLQALE | 2.5847 | 0.0129 |  | KLQSLQ | 2.5956 | 0.0099 |  | KLQSKA | 2.5845 | 0.0083 |  | KLQAEV | 2.5884 | 0.0105 |
| KLQANV | 2.5847 | 0.0086 |  | KLQSAN | 2.5958 | 0.0084 |  | KLQSVM | 2.5925 | 0.0083 |  | KLQSLG | 2.5871 | 0.0105 |
| KLQALN | 2.5848 | 0.0083 |  | KLQSNQ | 2.5958 | 0.0103 |  | KLQALN | 2.5848 | 0.0083 |  | KLQAGV | 2.5915 | 0.0107 |
| KLQSTD | 2.5852 | 0.0094 |  | KLQSND | 2.5962 | 0.0074 |  | KLQSSE | 2.6050 | 0.0083 |  | KLQAEQ | 2.6043 | 0.0108 |
| KLQATV | 2.5854 | 0.0097 |  | KLQSNM | 2.5963 | 0.0130 |  | KLQAVV | 2.5925 | 0.0084 |  | KLQATA | 2.5955 | 0.0109 |
| KLQAGG | 2.5856 | 0.0072 |  | KLQSKD | 2.5967 | 0.0118 |  | KLQSTG | 2.5865 | 0.0084 |  | KLQSEG | 2.5993 | 0.0110 |
| KLQATM | 2.5860 | 0.0090 |  | KLQASQ | 2.5968 | 0.0085 |  | KLQANQ | 2.5991 | 0.0084 |  | KLQAGD | 2.5821 | 0.0110 |
| KLQAVE | 2.5862 | 0.0125 |  | KLQSVG | 2.5971 | 0.0125 |  | KLQSAN | 2.5958 | 0.0084 |  | KLQSNA | 2.5842 | 0.0110 |
| KLQSTG | 2.5865 | 0.0084 |  | KLQSKG | 2.5973 | 0.0094 |  | KLQSEM | 2.5831 | 0.0084 |  | KLQSTQ | 2.5976 | 0.0112 |
| KLQAE  | 2.5867 | 0.0087 |  | KLQATQ | 2.5973 | 0.0078 |  | KLQASQ | 2.5968 | 0.0085 |  | KLQAGM | 2.5821 | 0.0112 |
| KLQSLG | 2.5871 | 0.0105 |  | KLQSTQ | 2.5976 | 0.0112 |  | KLQSAA | 2.5913 | 0.0085 |  | KLQSLM | 2.5884 | 0.0112 |
| KLQSAE | 2.5876 | 0.0117 |  | KLQASA | 2.5979 | 0.0103 |  | KLQASD | 2.5918 | 0.0085 |  | KLQSLN | 2.6006 | 0.0112 |
| KLQSLM | 2.5884 | 0.0112 |  | KLQSEE | 2.5984 | 0.0080 |  | KLQAKA | 2.5934 | 0.0086 |  | KLQSSQ | 2.6017 | 0.0113 |
| KLQAEV | 2.5884 | 0.0105 |  | KLQANA | 2.5986 | 0.0105 |  | KLQANV | 2.5847 | 0.0086 |  | KLQAVM | 2.5845 | 0.0116 |
| KLQSV  | 2.5885 | 0.0091 |  | KLQALM | 2.5987 | 0.0094 |  | KLQSGQ | 2.6045 | 0.0086 |  | KLQSKN | 2.5889 | 0.0116 |
| KLQAAM | 2.5885 | 0.0093 |  | KLQANQ | 2.5991 | 0.0084 |  | KLQAVD | 2.5999 | 0.0086 |  | KLQSSV | 2.5936 | 0.0116 |
| KLQAEM | 2.5885 | 0.0094 |  | KLQSEG | 2.5993 | 0.0110 |  | KLQALA | 2.5903 | 0.0086 |  | KLQAKQ | 2.5828 | 0.0117 |
| KLQAGE | 2.5887 | 0.0093 |  | KLQSVV | 2.5995 | 0.0073 |  | KLQSAD | 2.5845 | 0.0087 |  | KLQSAE | 2.5876 | 0.0117 |
| KLQSKN | 2.5889 | 0.0116 |  | KLQAVD | 2.5999 | 0.0086 |  | KLQSSG | 2.6106 | 0.0087 |  | KLQAAV | 2.6148 | 0.0118 |
| KLQAED | 2.5889 | 0.0082 |  | KLQSAG | 2.6001 | 0.0080 |  | KLQANM | 2.5839 | 0.0087 |  | KLQAKN | 2.5798 | 0.0118 |
| KLQAVQ | 2.5891 | 0.0122 |  | KLQSTA | 2.6005 | 0.0092 |  | KLQAE  | 2.5867 | 0.0087 |  | KLQSKD | 2.5967 | 0.0118 |
| KLQAGA | 2.5895 | 0.0074 |  | KLQSLN | 2.6006 | 0.0112 |  | KLQSGV | 2.5951 | 0.0087 |  | KLQAAA | 2.5940 | 0.0121 |
| KLQAEA | 2.5895 | 0.0096 |  | KLQSGE | 2.6007 | 0.0081 |  | KLQAAN | 2.6061 | 0.0088 |  | KLQAVQ | 2.5891 | 0.0122 |
| KLQAAE | 2.5898 | 0.0174 |  | KLQSSQ | 2.6017 | 0.0113 |  | KLQSAQ | 2.5907 | 0.0088 |  | KLQAAD | 2.5740 | 0.0125 |
| KLQAVN | 2.5898 | 0.0093 |  | KLQASG | 2.6034 | 0.0080 |  | KLQAVA | 2.6272 | 0.0088 |  | KLQAVE | 2.5862 | 0.0125 |
| KLQALA | 2.5903 | 0.0086 |  | KLQAKM | 2.6036 | 0.0102 |  | APO    | 2.5924 | 0.0089 |  | KLQSVG | 2.5971 | 0.0125 |
| KLQASV | 2.5903 | 0.0138 |  | KLQSGD | 2.6039 | 0.0078 |  | KLQAE  | 2.5938 | 0.0089 |  | KLQSEA | 2.5749 | 0.0127 |
| KLQSLD | 2.5905 | 0.0095 |  | KLQALG | 2.6041 | 0.0082 |  | KLQASN | 2.5909 | 0.0090 |  | KLQSKM | 2.5954 | 0.0127 |
| KLQAKG | 2.5905 | 0.0075 |  | KLQAEQ | 2.6043 | 0.0108 |  | KLQASM | 2.5928 | 0.0090 |  | KLQSEQ | 2.6187 | 0.0128 |
| KLQAKV | 2.5905 | 0.0076 |  | KLQSGQ | 2.6045 | 0.0086 |  | KLQATM | 2.5860 | 0.0090 |  | KLQALE | 2.5847 | 0.0129 |
| KLQSAQ | 2.5907 | 0.0088 |  | KLQAVG | 2.6046 | 0.0077 |  | KLQSTM | 2.5914 | 0.0090 |  | KLQSNM | 2.5963 | 0.0130 |
| KLQASN | 2.5909 | 0.0090 |  | KLQSSE | 2.6050 | 0.0083 |  | KLQANE | 2.5826 | 0.0091 |  | KLQATN | 2.5842 | 0.0132 |

|        |        |        |  |        |        |        |  |        |        |        |  |        |        |        |
|--------|--------|--------|--|--------|--------|--------|--|--------|--------|--------|--|--------|--------|--------|
| KLQAAG | 2.5911 | 0.0072 |  | KLQAAN | 2.6061 | 0.0088 |  | KLQSTN | 2.5930 | 0.0091 |  | KLQASV | 2.5903 | 0.0138 |
| KLQSAV | 2.5913 | 0.0094 |  | KLQSGA | 2.6071 | 0.0256 |  | KLQSVL | 2.5885 | 0.0091 |  | KLQSAM | 2.5704 | 0.0146 |
| KLQSAA | 2.5913 | 0.0085 |  | KLQSSG | 2.6106 | 0.0087 |  | KLQAKD | 2.5937 | 0.0091 |  | KLQATE | 2.5917 | 0.0146 |
| KLQSTM | 2.5914 | 0.0090 |  | KLQAAV | 2.6148 | 0.0118 |  | KLQSTA | 2.6005 | 0.0092 |  | KLQSLA | 2.5760 | 0.0154 |
| KLQAGV | 2.5915 | 0.0107 |  | KLQSEQ | 2.6187 | 0.0128 |  | KLQALQ | 2.5830 | 0.0092 |  | KLQAAE | 2.5898 | 0.0174 |
| KLQSTE | 2.5915 | 0.0102 |  | KLQAVA | 2.6272 | 0.0088 |  | KLQAGE | 2.5887 | 0.0093 |  | KLQSGA | 2.6071 | 0.0256 |
| KLQATE | 2.5917 | 0.0146 |  | KLQSVQ | 2.6596 | 0.3865 |  | KLQAKE | 2.5812 | 0.0093 |  | KLQSVQ | 2.6596 | 0.3865 |
| KLQASD | 2.5918 | 0.0085 |  | KLQAND | 2.6605 | 0.4222 |  | KLQSKQ | 2.5955 | 0.0093 |  | KLQAND | 2.6605 | 0.4222 |



Supplementary Table S4: RMSD and Rg from substrate dynamics ordered by substrate

| RMSD sorted by residue |           |         |  |           |           |         |
|------------------------|-----------|---------|--|-----------|-----------|---------|
| substrate              | mean (nm) | std-dev |  | substrate | mean (nm) | std-dev |
| APO                    | 0.206     | 0.023   |  | KLQAVM    | 0.194     | 0.024   |
| KLQAAA                 | 0.192     | 0.030   |  | KLQAVN    | 0.216     | 0.028   |
| KLQAAD                 | 0.180     | 0.017   |  | KLQAVQ    | 0.240     | 0.042   |
| KLQAAE                 | 0.218     | 0.027   |  | KLQAVV    | 0.200     | 0.024   |
| KLQAAG                 | 0.209     | 0.023   |  | KLQSAA    | 0.203     | 0.041   |
| KLQAAM                 | 0.177     | 0.025   |  | KLQSAD    | 0.229     | 0.033   |
| KLQAAN                 | 0.175     | 0.018   |  | KLQSAE    | 0.195     | 0.022   |
| KLQAAQ                 | 0.184     | 0.024   |  | KLQSAG    | 0.188     | 0.024   |
| KLQAAV                 | 0.191     | 0.026   |  | KLQSAM    | 0.230     | 0.035   |
| KLQAEA                 | 0.194     | 0.036   |  | KLQSAN    | 0.177     | 0.023   |
| KLQAED                 | 0.202     | 0.027   |  | KLQSAQ    | 0.201     | 0.022   |
| KLQAEF                 | 0.185     | 0.026   |  | KLQSAV    | 0.183     | 0.016   |
| KLQAEH                 | 0.206     | 0.023   |  | KLQSEA    | 0.222     | 0.041   |
| KLQAEM                 | 0.205     | 0.020   |  | KLQSEE    | 0.190     | 0.019   |
| KLQAEQ                 | 0.201     | 0.050   |  | KLQSEG    | 0.187     | 0.021   |
| KLQAEV                 | 0.209     | 0.029   |  | KLQSEM    | 0.224     | 0.030   |
| KLQAGA                 | 0.215     | 0.026   |  | KLQSEN    | 0.225     | 0.030   |
| KLQAGD                 | 0.244     | 0.040   |  | KLQSEQ    | 0.217     | 0.033   |
| KLQAGE                 | 0.184     | 0.021   |  | KLQSGA    | 0.238     | 0.187   |
| KLQAGG                 | 0.187     | 0.018   |  | KLQSGD    | 0.179     | 0.023   |
| KLQAGM                 | 0.193     | 0.032   |  | KLQSGE    | 0.182     | 0.028   |
| KLQAGQ                 | 0.192     | 0.025   |  | KLQSGN    | 0.206     | 0.036   |
| KLQAGV                 | 0.259     | 0.049   |  | KLQSGQ    | 0.181     | 0.023   |
| KLQAKA                 | 0.169     | 0.016   |  | KLQSGV    | 0.208     | 0.018   |
| KLQAKD                 | 0.217     | 0.019   |  | KLQSKA    | 0.222     | 0.032   |
| KLQAKE                 | 0.198     | 0.029   |  | KLQSKD    | 0.222     | 0.032   |

| Rg sorted by residue |           |         |  |           |           |         |
|----------------------|-----------|---------|--|-----------|-----------|---------|
| substrate            | mean (nm) | std-dev |  | substrate | mean (nm) | std-dev |
| APO                  | 2.5924    | 0.0089  |  | KLQAVM    | 2.5845    | 0.0116  |
| KLQAAA               | 2.5940    | 0.0121  |  | KLQAVN    | 2.5898    | 0.0093  |
| KLQAAD               | 2.5740    | 0.0125  |  | KLQAVQ    | 2.5891    | 0.0122  |
| KLQAAE               | 2.5898    | 0.0174  |  | KLQAVV    | 2.5925    | 0.0084  |
| KLQAAG               | 2.5911    | 0.0072  |  | KLQSAA    | 2.5913    | 0.0085  |
| KLQAAM               | 2.5885    | 0.0093  |  | KLQSAD    | 2.5845    | 0.0087  |
| KLQAAN               | 2.6061    | 0.0088  |  | KLQSAE    | 2.5876    | 0.0117  |
| KLQAAQ               | 2.5934    | 0.0079  |  | KLQSAG    | 2.6001    | 0.0080  |
| KLQAAV               | 2.6148    | 0.0118  |  | KLQSAM    | 2.5704    | 0.0146  |
| KLQAEA               | 2.5895    | 0.0096  |  | KLQSAN    | 2.5958    | 0.0084  |
| KLQAED               | 2.5889    | 0.0082  |  | KLQSAQ    | 2.5907    | 0.0088  |
| KLQAEF               | 2.5867    | 0.0087  |  | KLQSAV    | 2.5913    | 0.0094  |
| KLQAEH               | 2.5938    | 0.0089  |  | KLQSEA    | 2.5749    | 0.0127  |
| KLQAEM               | 2.5885    | 0.0094  |  | KLQSEE    | 2.5984    | 0.0080  |
| KLQAEQ               | 2.6043    | 0.0108  |  | KLQSEG    | 2.5993    | 0.0110  |
| KLQAEV               | 2.5884    | 0.0105  |  | KLQSEM    | 2.5831    | 0.0084  |
| KLQAGA               | 2.5895    | 0.0074  |  | KLQSEN    | 2.5764    | 0.0104  |
| KLQAGD               | 2.5821    | 0.0110  |  | KLQSEQ    | 2.6187    | 0.0128  |
| KLQAGE               | 2.5887    | 0.0093  |  | KLQSGA    | 2.6071    | 0.0256  |
| KLQAGG               | 2.5856    | 0.0072  |  | KLQSGD    | 2.6039    | 0.0078  |
| KLQAGM               | 2.5821    | 0.0112  |  | KLQSGE    | 2.6007    | 0.0081  |
| KLQAGQ               | 2.5804    | 0.0083  |  | KLQSGN    | 2.5939    | 0.0094  |
| KLQAGV               | 2.5915    | 0.0107  |  | KLQSGQ    | 2.6045    | 0.0086  |
| KLQAKA               | 2.5934    | 0.0086  |  | KLQSGV    | 2.5951    | 0.0087  |
| KLQAKD               | 2.5937    | 0.0091  |  | KLQSKA    | 2.5845    | 0.0083  |
| KLQAKE               | 2.5812    | 0.0093  |  | KLQSKD    | 2.5967    | 0.0118  |

|        |       |       |  |        |       |       |
|--------|-------|-------|--|--------|-------|-------|
| KLQAKG | 0.194 | 0.023 |  | KLQSKG | 0.196 | 0.051 |
| KLQAKM | 0.196 | 0.027 |  | KLQSKM | 0.211 | 0.033 |
| KLQAKN | 0.214 | 0.036 |  | KLQSKN | 0.206 | 0.028 |
| KLQAKQ | 0.194 | 0.023 |  | KLQSKQ | 0.204 | 0.039 |
| KLQAKV | 0.209 | 0.022 |  | KLQSKV | 0.213 | 0.030 |
| KLQALA | 0.224 | 0.029 |  | KLQSLA | 0.251 | 0.057 |
| KLQALD | 0.211 | 0.040 |  | KLQSLD | 0.188 | 0.028 |
| KLQALE | 0.209 | 0.025 |  | KLQSLE | 0.181 | 0.024 |
| KLQALG | 0.204 | 0.032 |  | KLQSLG | 0.218 | 0.033 |
| KLQALM | 0.217 | 0.030 |  | KLQSLM | 0.194 | 0.043 |
| KLQALN | 0.224 | 0.023 |  | KLQSLN | 0.187 | 0.023 |
| KLQALQ | 0.202 | 0.024 |  | KLQSLQ | 0.233 | 0.037 |
| KLQALV | 0.223 | 0.024 |  | KLQSLV | 0.232 | 0.032 |
| KLQANA | 0.218 | 0.050 |  | KLQSNA | 0.226 | 0.036 |
| KLQAND | 0.320 | 0.636 |  | KLQSND | 0.172 | 0.020 |
| KLQANE | 0.214 | 0.025 |  | KLQSNG | 0.228 | 0.028 |
| KLQANG | 0.227 | 0.024 |  | KLQSNM | 0.179 | 0.026 |
| KLQANM | 0.204 | 0.028 |  | KLQSNN | 0.193 | 0.020 |
| KLQANQ | 0.209 | 0.025 |  | KLQSNQ | 0.173 | 0.019 |
| KLQANV | 0.215 | 0.023 |  | KLQSSD | 0.205 | 0.023 |
| KLQASA | 0.227 | 0.030 |  | KLQSSE | 0.189 | 0.019 |
| KLQASD | 0.179 | 0.020 |  | KLQSSG | 0.216 | 0.028 |
| KLQASE | 0.192 | 0.021 |  | KLQSSN | 0.174 | 0.019 |
| KLQASG | 0.171 | 0.018 |  | KLQSSQ | 0.217 | 0.033 |
| KLQASM | 0.190 | 0.024 |  | KLQSSV | 0.247 | 0.031 |
| KLQASN | 0.214 | 0.031 |  | KLQSTA | 0.242 | 0.033 |
| KLQASQ | 0.199 | 0.024 |  | KLQSTD | 0.203 | 0.020 |
| KLQASV | 0.186 | 0.021 |  | KLQSTE | 0.183 | 0.024 |
| KLQATA | 0.180 | 0.024 |  | KLQSTG | 0.192 | 0.027 |
| KLQATD | 0.181 | 0.021 |  | KLQSTM | 0.193 | 0.040 |
| KLQATE | 0.207 | 0.027 |  | KLQSTN | 0.244 | 0.037 |

|        |        |        |  |        |        |        |
|--------|--------|--------|--|--------|--------|--------|
| KLQAKG | 2.5905 | 0.0075 |  | KLQSKG | 2.5973 | 0.0094 |
| KLQAKM | 2.6036 | 0.0102 |  | KLQSKM | 2.5954 | 0.0127 |
| KLQAKN | 2.5798 | 0.0118 |  | KLQSKN | 2.5889 | 0.0116 |
| KLQAKQ | 2.5828 | 0.0117 |  | KLQSKQ | 2.5955 | 0.0093 |
| KLQAKV | 2.5905 | 0.0076 |  | KLQSKV | 2.5928 | 0.0074 |
| KLQALA | 2.5903 | 0.0086 |  | KLQSLA | 2.5760 | 0.0154 |
| KLQALD | 2.5923 | 0.0082 |  | KLQSLD | 2.5905 | 0.0095 |
| KLQALE | 2.5847 | 0.0129 |  | KLQSLE | 2.5817 | 0.0101 |
| KLQALG | 2.6041 | 0.0082 |  | KLQSLG | 2.5871 | 0.0105 |
| KLQALM | 2.5987 | 0.0094 |  | KLQSLM | 2.5884 | 0.0112 |
| KLQALN | 2.5848 | 0.0083 |  | KLQSLN | 2.6006 | 0.0112 |
| KLQALQ | 2.5830 | 0.0092 |  | KLQSLQ | 2.5956 | 0.0099 |
| KLQALV | 2.5752 | 0.0102 |  | KLQSLV | 2.5936 | 0.0102 |
| KLQANA | 2.5986 | 0.0105 |  | KLQSNA | 2.5842 | 0.0110 |
| KLQAND | 2.6605 | 0.4222 |  | KLQSND | 2.5962 | 0.0074 |
| KLQANE | 2.5826 | 0.0091 |  | KLQSNG | 2.5953 | 0.0082 |
| KLQANG | 2.5743 | 0.0095 |  | KLQSNM | 2.5963 | 0.0130 |
| KLQANM | 2.5839 | 0.0087 |  | KLQSNN | 2.5936 | 0.0075 |
| KLQANQ | 2.5991 | 0.0084 |  | KLQSNQ | 2.5958 | 0.0103 |
| KLQANV | 2.5847 | 0.0086 |  | KLQSSD | 2.5953 | 0.0101 |
| KLQASA | 2.5979 | 0.0103 |  | KLQSSE | 2.6050 | 0.0083 |
| KLQASD | 2.5918 | 0.0085 |  | KLQSSG | 2.6106 | 0.0087 |
| KLQASE | 2.5925 | 0.0078 |  | KLQSSN | 2.5788 | 0.0102 |
| KLQASG | 2.6034 | 0.0080 |  | KLQSSQ | 2.6017 | 0.0113 |
| KLQASM | 2.5928 | 0.0090 |  | KLQSSV | 2.5936 | 0.0116 |
| KLQASN | 2.5909 | 0.0090 |  | KLQSTA | 2.6005 | 0.0092 |
| KLQASQ | 2.5968 | 0.0085 |  | KLQSTD | 2.5852 | 0.0094 |
| KLQASV | 2.5903 | 0.0138 |  | KLQSTE | 2.5915 | 0.0102 |
| KLQATA | 2.5955 | 0.0109 |  | KLQSTG | 2.5865 | 0.0084 |
| KLQATD | 2.5935 | 0.0082 |  | KLQSTM | 2.5914 | 0.0090 |
| KLQATE | 2.5917 | 0.0146 |  | KLQSTN | 2.5930 | 0.0091 |

|        |       |       |  |        |       |       |
|--------|-------|-------|--|--------|-------|-------|
| KLQATG | 0.200 | 0.025 |  | KLQSTQ | 0.177 | 0.027 |
| KLQATM | 0.209 | 0.024 |  | KLQSVA | 0.204 | 0.022 |
| KLQATN | 0.197 | 0.020 |  | KLQSVD | 0.204 | 0.022 |
| KLQATQ | 0.193 | 0.019 |  | KLQSVE | 0.190 | 0.025 |
| KLQATV | 0.226 | 0.033 |  | KLQSVG | 0.173 | 0.025 |
| KLQAVA | 0.267 | 0.043 |  | KLQSVM | 0.189 | 0.021 |
| KLQAVD | 0.187 | 0.020 |  | KLQSVN | 0.207 | 0.025 |
| KLQAVE | 0.245 | 0.063 |  | KLQSVQ | 0.271 | 0.564 |
| KLQAVG | 0.203 | 0.025 |  | KLQSVV | 0.207 | 0.033 |

|        |        |        |  |        |        |        |
|--------|--------|--------|--|--------|--------|--------|
| KLQATG | 2.5813 | 0.0101 |  | KLQSTQ | 2.5976 | 0.0112 |
| KLQATM | 2.5860 | 0.0090 |  | KLQSVA | 2.5885 | 0.0091 |
| KLQATN | 2.5842 | 0.0132 |  | KLQSVD | 2.5940 | 0.0073 |
| KLQATQ | 2.5973 | 0.0078 |  | KLQSVE | 2.5927 | 0.0078 |
| KLQATV | 2.5854 | 0.0097 |  | KLQSVG | 2.5971 | 0.0125 |
| KLQAVA | 2.6272 | 0.0088 |  | KLQSVM | 2.5925 | 0.0083 |
| KLQAVD | 2.5999 | 0.0086 |  | KLQSVN | 2.5845 | 0.0103 |
| KLQAVE | 2.5862 | 0.0125 |  | KLQSVQ | 2.6596 | 0.3865 |
| KLQAVG | 2.6046 | 0.0077 |  | KLQSVV | 2.5995 | 0.0073 |

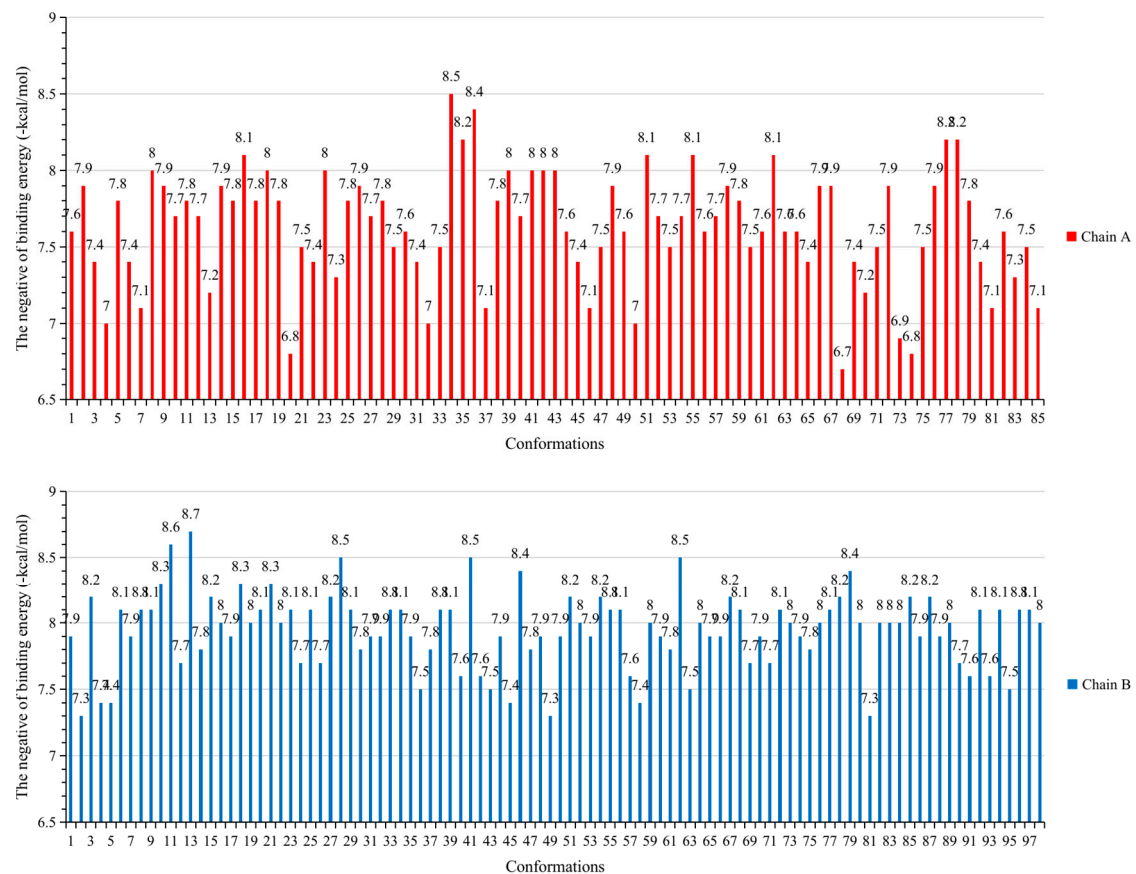

**Supplementary Figure S14. Preliminary docking studies to determine the protein chain to prioritise for docking studies.** The negative of the docking scores of the Arg-Leu-Gln-Ala-Ala-Asn (RLQAAN) conformers were plotted on bar graphs, showing the docking scores of chain A (red) and chain B (blue). The image was generated using WPS Spreadsheet 2019.
